1 **Title:** Effects of male age and female presence on male associations in a large, polygynous  
2 mammal in southern India

3

4 **Authors:** P. Keerthipriya, S. Nandini, T.N.C. Vidya \*

5

6 **Author affiliation (for all authors):** Evolutionary and Organismal Biology Unit,  
7 Jawaharlal Nehru Centre for Advanced Scientific Research (JNCASR), Bengaluru 560064,  
8 India.

9 Email: P. Keerthipriya: [keerthipriya@jncasr.ac.in](mailto:keerthipriya@jncasr.ac.in); S. Nandini: [nandinis@jncasr.ac.in](mailto:nandinis@jncasr.ac.in);

10 T.N.C. Vidya: [tncvidya@jncasr.ac.in](mailto:tncvidya@jncasr.ac.in); ORCID iD for T.N.C. Vidya: [0000-0002-7143-9008](https://orcid.org/0000-0002-7143-9008).

11

12

13 \* Corresponding author.

14

15 **Address for correspondence:**

16 T.N.C. Vidya

17 Jawaharlal Nehru Centre for Advanced Scientific Research

18 Jakkur

19 Bengaluru – 560 064, India.

20 Email: [tncvidya@jncasr.ac.in](mailto:tncvidya@jncasr.ac.in)

21 Phone: +91-80-22082968

22 Fax: +91-80-22082766

23

24

25

1 **Abstract**

2

3 We present here, the first detailed study of adult male associations in an Asian elephant  
4 population, using six years of data collected on identified males. As expected in a large,  
5 polygynous species, adult males spent greater proportions of their time solitarily or in  
6 mixed-sex groups than in all-male groups. However, the adult male associations seen were  
7 complex, with different patterns of male associations based on their age and on the presence  
8 or absence of females. Old and young males spent more time associating with their age-  
9 peers and less time associating across age classes than expected at random in the absence of  
10 females. Young males did not spend a greater proportion of their time with old males than  
11 with young males. Young males did not initiate associations with old males to a greater  
12 extent than old males approaching young males. Moreover, male age was not correlated  
13 with centrality measures in association networks and was negatively correlated with the  
14 number of unique associates per time in the absence of females. All of these suggest that  
15 male associations in female absence are primarily a means for males to test strengths against  
16 age-peers rather than an opportunity for social learning from old males. Male associations in  
17 female presence were rarer than in female absence, and old, reproductively competitive,  
18 males avoided each other in female presence, resulting in different male association network  
19 properties. Although male associations were generally weak and not stable across years,  
20 there were some significant associations. Overall, there was a smaller proportion of time  
21 spent in all-male groups, smaller group sizes, and a limited role of older males in the  
22 association network in the Kabini Asian elephant population compared to the  
23 phylogenetically closely related African savannah elephant. These differences may be  
24 related to differences in resource distributions in the two habitats.

25

26 **Keywords**

27 Asian elephant, male associations, association networks, Kabini, Kabini Elephant Project,  
28 testing-strengths hypothesis, social learning hypothesis, female presence/absence, male age.

29

30

31

## 1 **Introduction**

2

3 Adult males and females of many large mammals exhibit sexual dimorphism and strikingly  
4 different lifestyles, with female philopatry and male dispersal (see Greenwood 1980 and  
5 Ruckstuhl and Neuhaus 2000, Fitzpatrick *et al.* 2012). Interactions between males in such  
6 species, especially if the species is polygynous, are expected to be competitive rather than  
7 affiliative, with males competing with one another for access to receptive females (van  
8 Hooff and van Schaik 1994). Therefore, strong associations between males in species with  
9 female-philopatry are expected to be uncommon and occur primarily in the context of  
10 coalitions to defend or contest access to females (for example, Saayman 1971 in baboons,  
11 Schaller 1972, Bygott *et al.* 1979 in lions, Caro and Collins 1987 in cheetahs, Connor *et al.*  
12 1992, Moller *et al.* 2001 in bottlenose dolphins, Hill and van Hooff 1994, van Hooff and  
13 van Schaik 1994 in non-human primates, Wagner *et al.* 2008 in hyaenas). However, all-  
14 male groups are formed during foraging in some polygynous species, usually in the non-  
15 breeding season (for example, Lettevall *et al.* 2002 in sperm whales, Mooring *et al.* 2003 in  
16 desert bighorn sheep, Fischhoff *et al.* 2009 in plains zebras, Chiyo *et al.* 2011, 2012 in  
17 African savannah elephants). Male associations in such groups may be motivated by 1) the  
18 opportunities available for social learning (possibly African savannah elephants, Chiyo *et al.*  
19 2012), 2) the presence of age-mates, possibly to test their strengths against each other  
20 (mouflon sheep, Bon *et al.* 1993, African savannah elephants, Chiyo *et al.* 2011), 3)  
21 increased efficiency in obtaining food resources (river otters, Blundell *et al.* 2002), or 4)  
22 improved defense against predators (Cape ground squirrels, Waterman 1997, sperm whales,  
23 Cure *et al.* 2013). However, there has been little study on male association patterns in  
24 mammals overall.

25

26 Asian elephants (*Elephas maximus*) are polygynous, with males and females exhibiting  
27 different morphologies and adult lifestyles. Female society in this species is organised into  
28 clans that show fission-fusion dynamics (Sukumar 1989, Nandini *et al.* 2017, 2018), while  
29 pubertal males disperse from their natal groups and only temporarily associate with other  
30 males and with female groups thereafter (McKay 1973, Desai and Johnsingh 1995). Males  
31 are not known to form coalitions to defend females. They can also breed throughout the year  
32 and are not spatially segregated by sex for foraging during a non-breeding season.  
33 Moreover, female elephants are sexually receptive only for a few days (Eisenberg *et al.*  
34 1971) every four to five years, making receptive females a rare resource, for which males

1 are expected to compete intensely. Therefore, male-male affiliative associations in the  
2 species are expected to be very weak. Male African savannah elephants have been shown to  
3 have weak associations but complex relationships, with males preferring to associate with  
4 age-mates (Chiyo *et al.* 2011, Goldenberg *et al.* 2014 – in the case of sexually inactive  
5 males) and related males (Chiyo *et al.* 2011, although the effects of age and relatedness in  
6 this study were small), and older males being preferred associates or being more central to  
7 male society than young males (Evans and Harris 2008, Chiyo *et al.* 2011). Male  
8 associations were also shown to facilitate social learning: bulls who had an older crop raider  
9 as a top associate were more likely to raid themselves (Chiyo *et al.* 2012). Thus, all-male  
10 groups seem to provide an opportunity to spar and test strength and also possibly for  
11 younger males to learn from knowledgeable, older males in African savannah elephants.

12

13 While Asian and African elephants were previously assumed to have similar societies,  
14 female Asian elephant society is now known to be different from that of the African  
15 savannah elephant (de Silva and Wittemyer 2012, Nandini *et al.* 2018), probably because of  
16 female group sizes being constrained due to ecology in the Asian elephant (Nandini *et al.*  
17 2017, 2018). Since males, being larger and continuing to grow in size as they age (Sukumar  
18 *et al.* 1988), are likely to require more food than females, such a constraint might also exist  
19 in male Asian elephants and lead to differences in male societies across species, despite  
20 their phylogenetic closeness. Moreover, male African savannah elephants were known to  
21 return to the same bull areas (areas frequented by males and not by many female groups)  
22 when sexually inactive (Poole 1982), providing an opportunity for repeated associations  
23 with specific individuals. An absence of separate bull areas in Asian elephant populations  
24 might lower male sociality in this species. We, therefore, wanted to examine associations  
25 among adult male Asian elephants in order to find out whether ecological differences  
26 possibly correlated with a different male social structure than in the African savannah  
27 elephant, despite the phylogenetic similarity between species.

28

29 We aimed to find out how prevalent, stable, and strong male associations were in the Asian  
30 elephant and what factors might affect such associations. We hypothesized that male  
31 associations might be based on opportunities available for a) social learning from older  
32 individuals and/or b) testing strengths. Increased efficiency in obtaining food resources was  
33 not likely to be a factor for adult male groupings in elephants because individuals require  
34 large amounts of food and grouping is likely to create food competition instead. Defense

1 against predators was also not likely to be important because adult male elephants inside  
2 protected areas do not have any natural predators. We did not examine genetic relatedness  
3 as a reason for associations in this paper.

4  
5 We set out to address the following questions:

6 *1) What is the proportion of time that males spend in all-male groups and how is this*  
7 *related to male age?* Based on high competition amongst males in polygynous species  
8 and the possibility that female Asian elephants prefer older males (Chelliah and  
9 Sukumar 2015), we expected that older males would spend less time associating with  
10 other males in all-male groups and more time in mixed-sex groups than younger males.  
11 Although older males were seen more often than younger males in all male groups of the  
12 African savannah elephant (see Chiyo *et al.* 2011, Goldenberg *et al.* 2014), that pattern  
13 would possibly be reversed if there was a constraint on group size.

14  
15 *2) How does male age and the presence or absence of females in the vicinity affect patterns*  
16 *of associations between males?* We expected different patterns of male associations  
17 based on male age depending on whether associations were based on social learning or  
18 testing strengths. If male associations were primarily based on social learning from older  
19 individuals (a), younger males would seek out older males more often than expected by  
20 chance alone. If there was social learning, but older males were restricted in the amount  
21 of time they spent with other males (possibly due to group size constraints), we expected  
22 that we would find older males to spend less time in all-male groups (as mentioned in  
23 point 1 above), but the proportion of young males' time that was spent with older males  
24 to be higher than that spent with young males. We also expected that older males would  
25 have more associates than young males and, hence, be more central in networks of all-  
26 male associations. If the primary purpose of male associations was to test strengths (b),  
27 males would be expected to preferentially associate (relative to population age-structure)  
28 with age-mates than with much younger or older individuals, whose relative strengths  
29 are easily assessed by size differences. Older males might know their strengths better  
30 through their experience, and need to assess strength with other old males less often than  
31 younger males who are still learning. Therefore, we expected that, among common  
32 males, old males would meet each other at random while younger males would spend  
33 more time with each other than expected. However, this might not be true when more  
34 uncommon males were included and both old and young males might associate more

1 with males from the same age-class than of the other age class if associations were  
2 primarily to test strengths. Older males might also be expected to spend less time in all-  
3 male groups or form smaller all-male groups than younger males because of increasing  
4 food competition due to larger body size.

5  
6 Since competition for females could play a major role in how males associated, we  
7 examined male associations in the immediate presence and absence of females. Unlike  
8 in the African savannah elephants, there were no separate bull areas in our study area  
9 and there were no clear indicators of active and inactive sexual states outside of musth  
10 (the proportion of time males spent with female groups was also not different between  
11 musth and nonmusth males, Keerthipriya *et al.* 2018). We expected the amount of time  
12 spent in male associations to be lower overall in female presence compared to female  
13 absence because of potential competition. If associations were based on testing strength  
14 (b), males (of similar ages) were expected to spend a greater proportion of their time in  
15 female absence than in female presence associating with other males. Further, if the  
16 absolute time spent by males was greater in female absence than presence, males might  
17 also meet a greater number of other males in female absence, resulting in the male  
18 association network in female absence being denser and better connected than that in  
19 female presence. If associations were based on social learning (a), males might associate  
20 with older males to a smaller extent in female presence if the learning was only related  
21 to resources, to a larger extent if the learning was related to reproduction, or to the same  
22 extent if both played an equal role. The network would be better connected in female  
23 absence than presence, with older males being more central and having more  
24 connections in the network if the learning was related to resources, and better connected  
25 in female presence than absence, with older males being more central and having more  
26 connections if the learning was related to reproduction.

27  
28 3) *Are there preferential associations between males and, if so, are they were stable over*  
29 *time?* We did not have any *a priori* expectation about whether preferred, stable  
30 associations should be present or not, but if they occurred, we expected them to be less  
31 frequent than that in the African savannah elephant due to possible group size  
32 constraints.

## 1 **Methods**

2

### 3 *Field data collection*

4 The field study was carried out in Nagarahole and Bandipur National Parks and Tiger  
5 Reserves (Nagarahole: 11.85304°-12.26089° N, 76.00075°-76.27996° E, 644 km<sup>2</sup>;  
6 Bandipur: 11.59234°-11.94884° N, 76.20850°-76.86904° E, 872 km<sup>2</sup>) in southern India  
7 from March 2009 to July 2014. Nagarahole and Bandipur are part of the larger Nilgiris-  
8 Eastern Ghats landscape (see Nandini *et al.* 2017) and support a high density of elephants  
9 (~1-2 elephants/km<sup>2</sup>, AERCC 2006, Baskaran *et al.* 2011). We refer to the elephants in these  
10 two parks as the Kabini population. Nagarahole and Bandipur National Parks are separated  
11 by the Kabini reservoir, which is a perennial source of water in the dry season. Because of  
12 the higher density of elephants around the reservoir and better visibility for behavioural  
13 observations, our sampling was centred around the reservoir, and extended to the forests in  
14 either direction with lower frequency of sampling (see Nandini *et al.* 2017). Elephants in the  
15 area are accustomed to tourist vehicles. We sampled pre-selected forest routes (see Nandini  
16 *et al.* 2017 for details) in the study area from early morning to late evening (~6:30 AM am  
17 to 6:00-6:45 PM depending on field permits and light conditions).

18

19 We tried to sex, age, and identify all the elephants sighted. Asian elephants are sexually  
20 dimorphic, with males being taller and bulkier than females (Sukumar *et al.* 1988) apart  
21 from differences in genitalia. Females do not possess tusks, although some males (called  
22 makhnas) are also tuskless. We estimated age based on shoulder height, body length, skull  
23 size, and skin folds (see Vidya *et al.* 2014), with semi-captive elephants in the same area  
24 serving as a reference for ageing older animals. We placed males into the following age  
25 categories: calves (<1 year), juveniles (1-<5 years), sub-adults (5-<15 years), young adults  
26 (15-<30 years), and old adults (>=30 years). Subadult males would be starting to disperse  
27 away from their natal groups or still be in the process of dispersing. Young adult males were  
28 likely to have completely dispersed from their natal herds but were possibly less  
29 reproductively competitive than old adult males, based on studies of African savannah  
30 elephants (Poole 1982, Poole *et al.* 2011). The ages used for classifying males into these  
31 categories were those calculated at the mid-point of the study period (November 2012). We  
32 identified individuals based on a combination of ear, back, tail, tusk, and body  
33 characteristics (detailed in Vidya *et al.* 2014). We recorded details of group size, GPS  
34 location, and time of sighting, and also whether adult males were in female presence or

1 absence. Females were classified as adults when they were 10 years old (see Nandini *et al.*  
2 2018). Adult males were said to associate with a female group (one or more adult females  
3 and their young that were in close proximity and showed coordinated movement; see  
4 Nandini *et al.* 2018) if they fed within 10 m (easy physical reach) of a group member or  
5 interacted with any group member. When two males associated with the same female group  
6 at the same time, they were said to be associating with each other in female presence.  
7 Occasionally (only three different sightings totaling 23 minutes), males were seen to  
8 associate with subadult females (5-10 years old) in the absence of an adult female and this  
9 was also considered to be association in female presence. Males were said to associate with  
10 each other in female absence if they fed within about 30-50 m of each other and there were  
11 no females in the vicinity. At this distance, the males would be able to display or react to  
12 visual signals, apart from sensing one another through sound or smell. Males could indulge  
13 in sparring during their associations, but if males, upon encountering each other, displayed  
14 only aggressive interactions and moved away, they were not said to be associating.

15

#### 16 *Data Analysis*

17 Data analysis was carried out using only those sightings in which all adult males were aged  
18 and identified and female group compositions (if applicable) were known. Of the 878 days  
19 of field work between 2009 and 2014, elephants were sighted on 853 days and identified  
20 adult males were sighted on 718 days. In many of the analyses mentioned below, only males  
21 who were sighted on at least 5 different days in that particular category (such as group  
22 composition type or female presence) were used, as associations of males seen rarely are  
23 unlikely to represent their actual association patterns and may bias the results. Similarly, if  
24 there was a comparison between different categories (such as associations in female  
25 presence and absence), common males seen on at least 5 different days in each of the  
26 categories were used. ANCOVAs and non-parametric tests (Mann-Whitney *U* tests,  
27 Wilcoxon's matched-pairs test and Spearman's rank order correlations) were performed  
28 using Statistica 7 (StatSoft, Inc. 2004) and randomisations were carried out using MATLAB  
29 (MATLAB R2011a, MathWorks, Inc, 1984-2011, [www.mathworks.com](http://www.mathworks.com)) unless specified  
30 otherwise.

31

32 *Proportions of their time that males spent in all-male and mixed sex groups and their*  
33 *relationship with male age*



1 We calculated the number of minutes individual males (that were seen on at least 5 different  
2 days) were seen in the following group types and calculated the proportions of each  
3 individual's time spent in such groups: 1) solitary, 2) all male groups with only one adult  
4 male (but including subadult or juvenile males and, therefore, not solitary), 3) all male  
5 groups with more than one adult male, and 4) mixed-sex groups. An ANCOVA was carried  
6 out on the logit transformed proportions of their time individual males spent in different  
7 group types, using group type as the independent categorical variable and age of the male as  
8 a continuous covariate, in order to examine whether the proportions of time spent in  
9 different group types were significantly different and whether they were based on male age.  
10 Since the four proportions add up to one and are, therefore, not independent, and the number  
11 of males seen in group type 2 was small, we performed the ANCOVA on two of the four  
12 categories: all male groups with more than one adult male, and mixed-sex groups.

13

#### 14 *Effect of male age and the presence or absence of females on male association patterns*

15 We looked at the initiation of associations and the pattern of associations between males to  
16 understand whether social learning might be a possible reason for associations. In order to  
17 find out whether younger males sought out older males more often than expected by chance  
18 alone, we examined all the instances (dyadic combinations) of a male (or males)  
19 approaching another male (or males) to associate in the presence or absence of females. Of  
20 the dyads that included one old (30+ years old) and one young (15-30 years old) male, we  
21 calculated the number of times the old male approached the young male and vice versa.  
22 Given two males of different ages in close proximity, it was theoretically possible that either  
23 of them could approach the other. We tested for a significantly higher number of older  
24 males or younger males being approached by using a z test approximation of the binomial  
25 test. For this analysis, we used data from the years 2011-2014 (during which detailed  
26 behavioural observations were available). We also carried out the test using the relative ages  
27 of the two males instead of placing them in two age-classes. Younger males would approach  
28 older males more often than expected if social learning were the primary reason for  
29 associations.

30

31 We examined male associations with respect to age to find out whether associations were  
32 largely between age-mates (expected in the testing-strengths hypothesis) or between old and  
33 young males (expected in the social learning hypothesis). In order to find out whether males  
34 preferentially associated with age-mates more often than expected by chance, we used the

1 procedure for randomising associations found in Whitehead (2008, pg. 124, following the  
2 method of Bedjer *et al.* 1998). We permuted associations between all identified adult males,  
3 by switching individual males across sightings (where each sighting represented one minute  
4 of association) while keeping the group size and the time seen for each male constant. In  
5 one set of randomisations (referred to as *males permuted*), we permuted males separately for  
6 the dataset of males in female presence and in female absence. In a second set of  
7 randomisations (referred to as *males and female presence permuted*) we used the entire  
8 dataset combining female presence and absence, and permuted individual males and also  
9 randomly assigned the sightings as being in female presence or absence (conserving the  
10 total number of sightings in both categories). For each set of randomisations, we used 5000  
11 permutations, with the number of flips performed in each permutation being five times the  
12 number of sightings in that dataset. We calculated the time old ( $\geq 30$  years) and young (15-  
13 30 years) males spent in groups with other males of the same or different age class in the  
14 observed dataset and compared these observed values to the values from the permuted  
15 datasets. We calculated the probability of the observed value being significantly higher or  
16 lower than that expected at random using the number of randomisations in which the  
17 randomised value was higher or lower than observed ( $P < 0.025$  for statistical significance as  
18 we had no prior expectation about whether the observed values would be lower or higher  
19 than the random values). We repeated the “*males permuted*” randomisations with the  
20 common males alone (seen on five days or more both in female presence and absence) to  
21 verify whether the results remained unchanged.

22  
23 Using the common males, we also calculated the age difference (rather than using the old-  
24 young classification above) between all unique pairs of males who associated together and  
25 tested for differences in age when the association was in female presence and in female  
26 absence, using a Mann-Whitney *U* test. We further weighted these age differences by the  
27 number of minutes the males associated with each other and compared the distributions of  
28 age difference between associates in female presence and absence using a Kolmogorov-  
29 Smirnov two sample test (Sokal and Rohlf, 1981, pp. 440-445).

30  
31 The proportion of time (out of total time the male was seen) that males spent associating  
32 with other males in female presence and absence was compared using an ANCOVA with  
33 female presence as a categorical factor and age of the male as a covariate. In order to find  
34 out whether young males spent more time associating amongst themselves in female

1 absence than old males (who might know their strengths better) did amongst themselves in  
2 female absence, we compared the proportions of their time young males spent associating  
3 with other young males with the proportions of their time old males spent associating with  
4 other old males in female absence using a Mann-Whitney  $U$  test (individual males used as  
5 the replicate). We also compared the proportion of their time young males spent with other  
6 young males to the proportion of their time young males spent with old males using the  
7 Wilcoxon matched-pairs test. This was done separately for time spent in female presence  
8 and absence. We had expected that if there was social learning, but older males were  
9 restricted in the amount of time they spent with other males, the proportion of young males'  
10 time that was spent with older males would still be higher than that they spent with other  
11 young males.

12

13 In order to find out whether old males experienced smaller group sizes than young males,  
14 we examined the effects of age-class and female presence on the number of males present  
15 within groups (including solitary males of group size 1). We compared the average group  
16 sizes experienced by males seen for five days or more, both in female presence and absence,  
17 using an ANOVA with age-class and female presence as factors.

18

19 Since we had wanted to examine how females affect male associations, we also compared  
20 male association networks in female presence and absence. In order to do this, we first  
21 calculated association indices (AI) between pairs of males as the duration of time two males  
22 spent together ( $N_{AB}$ ), divided by the total duration of time the two males were seen ( $N_A+N_B-$   
23  $N_{AB}$ ). We found male associations to change quickly (unlike female associations, where the  
24 associates were stable for longer periods of time): therefore, every minute of association  
25 was used to calculate the association index between pairs of males, making it a proportion  
26 of time rather than the more conventionally used proportion of sightings when two animals  
27 were seen together. Using AIs, we constructed association networks of adult males seen on  
28 at least 5 different days in both female presence and female absence (for instance,  
29  $AI_{AB(F\_abs)}=N_{AB(F\_abs)}/(N_{A(F\_abs)}+N_{B(F\_abs)}-N_{AB(F\_abs)})$ , where F\_abs refers to female absence).  
30 The networks were visualized and network statistics (see below) calculated using Gephi  
31 0.8.2 (Bastian *et al.* 2009). The network comprised males (*nodes* or *vertices* in the network)  
32 connected to one another depending on their associations (connections being *edges* in the  
33 network). The *degree* of a node (male) is the number of edges (associates of the focal male)  
34 arising from the node. We compared the degree distributions of association networks in

1 female presence and absence to their Poisson expectation (expected for a Erdős-Rényi  
2 random network; Erdős and Rényi 1960) using Statistica 7 (StatSoft, Inc. 2004) to test  
3 whether associations were random.

4  
5 We then compared the following network statistics between male association networks in  
6 female presence and absence: average degree, average *clustering coefficient*, average *path*  
7 *length*, and *network density* (Latapy 2008; see Wasserman and Faust 1994). We calculated the  
8 average degree of old and young males with other old and young males (all four  
9 combinations) separately. Clustering coefficient of a male is the proportion of the total  
10 possible connections between his associates that exist. The average clustering coefficient  
11 was calculated by averaging across all males who had at least two associates (i.e.  
12  $\text{degree} \geq 2$ ). The path length between two nodes (males) is the number of edges that lie on  
13 the shortest path between them. Path lengths were averaged for all pairs of nodes that were  
14 connected in the network to obtain average path length. Shorter path lengths indicate closer  
15 connections. Density is the proportion of all possible edges that exist in the network and is  
16 also a measure of the connectedness the network. In order to examine how male age and  
17 female presence or absence might affect the strength of male associations, we also  
18 calculated the average non-zero AI between pairs of old males, young males, and old and  
19 young males. As AI values are properties of dyads (unlike degree which is a node-level  
20 property and hence, averaged over the number of males in the focal males' age-class) and  
21 symmetric (that is  $AI_{AB} = AI_{BA}$ ) the average non-zero AI of old-young dyads is the same as  
22 the average value for young-old dyads (averaged over the number of old-young dyads which  
23 were observed associating). Thus, while there were four combinations when we compared  
24 degree, there were only three when we compared non-zero AI.

25  
26 We compared these network statistics and AIs in female presence and absence using a  
27 sampled randomization test (Sokal and Rohlf 1981, pp. 791-794). In this test, we created  
28 10,000 permuted datasets (permuted by randomly assigning rows of data to female presence  
29 or absence, while conserving the sample size for both the categories) and the observed  
30 differences in network statistics and AI between the original female presence and female  
31 absence datasets were compared to the differences between the permuted 'female presence'  
32 and 'female absence' datasets. The probability of a significant difference between the  
33 observed values was calculated as the proportion of randomisations that yielded a greater or

1 equal difference in statistic based on the permuted datasets compared to the difference  
2 between the observed values.

3

4 We also compared the number of associates controlled by the time seen (*degree/time*) for  
5 the same male in female presence and absence using Wilcoxon's matched-pairs test. While  
6 we had compared the time spent together by males of different age-classes in female  
7 presence and absence, that time could either be spent by forming weaker alliances with  
8 many males or stronger alliances with fewer males. Therefore, we examined degree/time as  
9 well as degree.

10

11 Since we had expected that older males would be more central to male social networks if  
12 social learning played an important role in male associations, we calculated three measures  
13 of network centrality – *closeness centrality*, *betweenness centrality* and *Eigenvector*  
14 *centrality* – for different individuals (see Bonacich 1972, Wasserman and Faust 1994).  
15 Closeness centrality is the inverse of the sum of path lengths from a focal node to all the  
16 other nodes, making it a measure of how close the focal node is to other nodes. Betweenness  
17 centrality is the proportion of all shortest paths between all other pairs of nodes that pass  
18 through the focal node. Therefore, a node with high betweenness centrality is important to  
19 the connectedness of the network. Eigenvector centrality is a measure of the influence of the  
20 node. Nodes are assigned relative scores and their connections to nodes are weighted by the  
21 centrality value of the associate nodes; connections to high scoring nodes contribute more to  
22 this centrality than connections to a low scoring node. Centrality measures and clustering  
23 coefficient were calculated using Gephi 0.8.2 (Bastian *et al.* 2009). We compared centrality  
24 values, as well as clustering coefficient and degree/time between males of different ages in  
25 female presence and in female absence in order to find out whether old males were more  
26 central, more connected, and had a higher rate of associations. This was done by correlating  
27 these statistics with male age using Spearman's rank-order correlations.

28

### 29 *Preferred male associations and stability of associations*

30 We wanted to see if there were preferred associations or avoidance amongst identified males  
31 within sampling periods smaller than the entire dataset and, therefore, tested for this using  
32 SOCPROG 2.6 (Whitehead 2015). We used a sampling period of 14 days and 10,000  
33 permutations with 10,000 flips for each permutation. We used the '*permute associations*  
34 *within samples*' method which tests for long-term (across sampling period) preferences and

1 avoidances (Whitehead 2015). The presence of long-term preference/avoidance is indicated  
2 by significantly higher SD (standard deviation) and CV (coefficient of variation) of AI  
3 values from the real dataset when compared to the randomised datasets. We additionally  
4 determined a top associate (based on AI value) for all identified males who associated with  
5 more than one male (degree $\geq$ 2) of a particular age category. We checked whether the AI  
6 values of males' top associates from the same age-class were significantly higher than the  
7 non-zero AI values of other associates in that age-class. This was done by comparing the list  
8 of all focal males' top associates' AI values with that of other non-zero AI values using a  
9 Mann-Whitney  $U$  test (paired values for each male would obviously give a significant  
10 difference). Similarly, the AI values with the top associates of the other age-class were also  
11 compared with the average non-zero AI values with males of the other age-class.

12

13 In order to determine whether adult male associations were stable across years, we  
14 compared AI matrices between consecutive years, using those males that were common to  
15 and seen for at least 30 minutes in both years, by performing Mantel tests of matrix  
16 correlation (Mantel 1967) with 5000 permutations, using MATLAB (MATLAB R2011a,  
17 MathWorks, Inc, 1984-2011, [www.mathworks.com](http://www.mathworks.com)). Implementing a cutoff of males seen  
18 at least for 5 days in a year would reduce the sample size drastically; therefore, a 30 minute  
19 cutoff was used for this analysis. However, we found that the number of minutes and the  
20 number of days males were sighted were strongly correlated with each other  
21 (Supplementary material 1). Since the amount of data collected during 2009 and 2010 were  
22 small, only data from 2011-2014 were used for this analysis. Mantel tests were performed  
23 separately on male associations in female presence and in female absence.

24

25

## 26 **Results**

27

28 *Proportion of their time that males spend in all-male groups and its relationship with male*  
29 *age*

30 Based on sightings in which all adult males were aged and identified, there were a total of  
31 96 identified elephants (see Supplementary material 1, 2). Only 56 males were seen in the  
32 presence of females and 91 males were seen in the absence of females. When we examined  
33 the percentage of time we observed males in different group types, about 61% of our  
34 observation time comprised males that were solitary, about 29% comprised males as part of

1 mixed-sex groups, and about 6% comprised males as part of all-male groups with more than  
 2 one adult male. However, since this time could include males seen just once, we used the set  
 3 of males seen on at least five different days and examined what proportion of their time was  
 4 spent in groups of different types. The trend was the same, with males spending a greater  
 5 proportion (average=50.7%) of their time solitarily, followed by that in mixed-sex groups  
 6 (35%), and in adult all-male groups (10.6%) (Table 1). Surprisingly, there was no effect of  
 7 age on the proportion of their time spent in different group types (ANCOVA: male age as  
 8 covariate:  $N=43$  males seen on  $\geq 5$  days,  $F_{1,83}=2.110$ ,  $P=0.150$ ) but the proportion of time  
 9 spent in mixed sex groups was higher than that spent in all-male groups with other adult  
 10 males (ANCOVA: group type as fixed factor:  $F_{1,83}=101.637$ ,  $P<0.001$ ; the results did not  
 11 change when untransformed data were used, see Supplementary material 3).

12

13

14 Table 1. Observation time for all identified adult males and males seen on at least 5 days (in  
 15 female presence or absence) in different group types, whether the group type represents the  
 16 presence or absence of females in the vicinity, and the average percentage of their time  
 17 spent by males in different group types. The percentage of hours of observation in different  
 18 group types is simply based on the total hours of observation in different group types. The  
 19 average percentage of time spent by males seen on at least 5 days in different group types is  
 20 based on the percentages of their time each of those males spent in each of the group types.

21

| Group type                      | Female presence / absence | Hours of observation in group type ( $N=96$ males seen in all) | Percentage of hours of observation in different group types | Hours of observation ( $N=43$ males seen on $\geq 5$ days) | Average percentage of their time spent by 43 males $\pm$ SD |
|---------------------------------|---------------------------|----------------------------------------------------------------|-------------------------------------------------------------|------------------------------------------------------------|-------------------------------------------------------------|
| Solitary                        | Female absence            | 732.18                                                         | 60.56%                                                      | 685.40                                                     | 50.72 $\pm$ 22.405                                          |
| All-male groups (1 adult male)  | Female absence            | 50.30                                                          | 4.16%                                                       | 47.77                                                      | 3.66 $\pm$ 4.349                                            |
| All-male groups (>1 adult male) | Female absence            | 74.77                                                          | 6.18%                                                       | 157.20                                                     | 10.56 $\pm$ 10.614                                          |
| Mixed-sex groups                | Female presence           | 351.78                                                         | 29.10%                                                      | 374.63                                                     | 35.07 $\pm$ 23.108                                          |

22

1

2 *Effect of male age and the presence or absence of females on male association patterns*

3 Frequency of males approaching older and younger males

4 In the presence of females, we observed 19 instances of old male (30+ years old)-young  
5 male (15-30 years old) dyads where one male approached the other (as opposed to dyads  
6 already present when we began the observation). The young male approached the old male  
7 on 8 (42.1%) occasions, which was not statistically significantly different from 50%  
8 ( $z=0.689$ ,  $P=0.491$ ). In female absence, we observed 27 old male-young male dyads and the  
9 young male approached the old male on 14 (51.9%) occasions, which was also not  
10 significantly different from 50% ( $z=0.187$ ,  $P=0.852$ ). When we used the relative ages of the  
11 two males approaching instead of placing them within the two age-classes, the younger  
12 male approached the older male in female presence 14 out of 28 times and the younger male  
13 approached the older male in female absence 19 out of 50 times. Neither of these was  
14 statistically different from 50% (female presence:  $z=0.000$ ,  $P=1.000$ ; female absence:  
15  $z=1.697$ ,  $P=0.090$ ). Therefore, old and young males were equally likely to approach each  
16 other to associate. If at all there was a trend in the last test, it was in the direction of older  
17 males possibly approaching younger males to a greater extent than vice versa.

18

19 Associations between males of different age-classes/ages in female presence and absence

20 The total amount of time males were seen in female presence was 21,107 minutes (351.78  
21 hours) and the total amount of time males were seen in female absence was 51,435 minutes  
22 (857.25 hours, Table 1). The observed amount of time males spent together was higher in  
23 female absence than female presence, for all three age-class combinations (Figure 1). As  
24 mentioned in the Methods, we compared the observed male associations in female presence  
25 and absence with those obtained by randomly permuting either males alone within the  
26 female presence or female absence datasets, or by permuting both males and female  
27 presence/absence status for the sighting across the entire dataset. We found that the time  
28 spent together by old adult males ( $\geq 30$  years) in female presence (222 minutes) was  
29 significantly lower than that expected from both the randomly permuted datasets (males  
30 permuted: average  $\pm$  SD:  $377.6 \pm 16.32$ ,  $P<0.001$ ; males and female presence permuted:  
31 average  $\pm$  SD:  $529.7 \pm 21.38$ ,  $P<0.001$ ). However, the time spent together by young males  
32 (15-30 years) in female presence (1034 minutes) was significantly higher than that expected  
33 from the randomly permuted datasets (males permuted: average  $\pm$  SD:  $747.0 \pm 19.61$ ,  
34  $P<0.001$ ; males and female presence permuted: average  $\pm$  SD:  $544.1 \pm 21.49$ ,  $P<0.001$ ;



1 Figure 1). The observed time old and young males were seen together (1031 minutes) was  
 2 not significantly different from random (males permuted: average  $\pm$  SD:  $1063.6 \pm 121.02$ ,  
 3  $P=0.055$ ; males and female presence permuted: average  $\pm$  SD:  $1055.7 \pm 29.22$ ,  $P=0.397$ ).  
 4 On the other hand, when we examined the time spent together in female absence, both old  
 5 males (1518 minutes) and young males (1608 minutes) spent a greater amount of time  
 6 associating amongst themselves than expected at random (old males: males permuted:  
 7 average  $\pm$  SD:  $1436.5 \pm 28.73$ ,  $P=0.002$ ; males and female presence permuted: average  $\pm$   
 8 SD:  $1289.8 \pm 30.02$ ,  $P<0.001$ ; young males: males permuted: average  $\pm$  SD:  $1149.2 \pm 26.24$ ,  
 9  $P<0.001$ ; males and female presence permuted: average  $\pm$  SD:  $1325.9 \pm 30.81$ ,  $P<0.001$ ;  
 10 Figure 1). The time that old and young males spent together (2110 minutes) was  
 11 significantly lower than random (males permuted: average  $\pm$  SD:  $2535.0 \pm 32.61$ ,  $P<0.001$ ;  
 12 males and female presence permuted: average  $\pm$  SD:  $2573.0 \pm 38.44$ ,  $P<0.001$ ; Figure 1).  
 13 When the ‘males permuted’ randomisations were run using only the 33 common males (who  
 14 were seen on five days or more both in female presence and absence), we found that old  
 15 males met each other at random in female absence, while the other results remained similar  
 16 (see Supplementary material 4).  
 17  
 18

a) Female presence

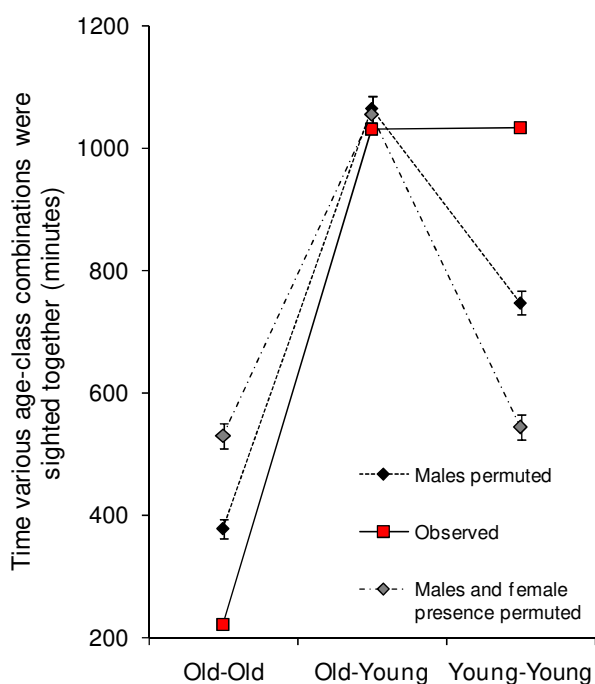

b) Female absence

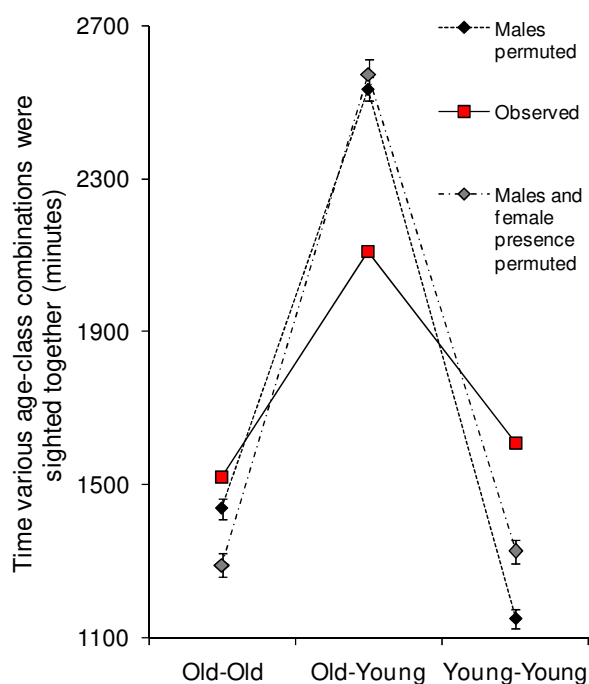

19

1 Figure 1. Permuted and observed values of time spent together by adult males of the same  
2 and different age-classes in a) female presence and b) female absence. Old males are  $\geq 30$   
3 years and young males are 15-30 years old. Please note that the Y axis is on different scales  
4 in the two panels.

5  
6  
7 The age differences between unique pairs of associating common males were not  
8 significantly different between female presence (average  $\pm$  SD:  $11.2 \pm 7.54$ ) and absence  
9 (average  $\pm$  SD:  $9.5 \pm 6.61$ ) (Mann-Whitney U test:  $N_{F\_presence}=33$  pairs of males,  
10  $N_{F\_absence}=68$  pairs,  $U=971.000$ ,  $Z_{adj}=1.093$ ,  $P=0.277$ ), but the distributions of age  
11 differences, taking into account, the amount of time spent together in associations, were  
12 significantly different between the two categories (Kolmogorov-Smirnov two sample test:  
13  $D=0.331$ ,  $P<0.001$ ). Males with an age difference of less than five years spent the maximum  
14 percentage of time in female absence together, while such males spent among the least  
15 percentage of time in female presence together (Figure 2).

16  
17

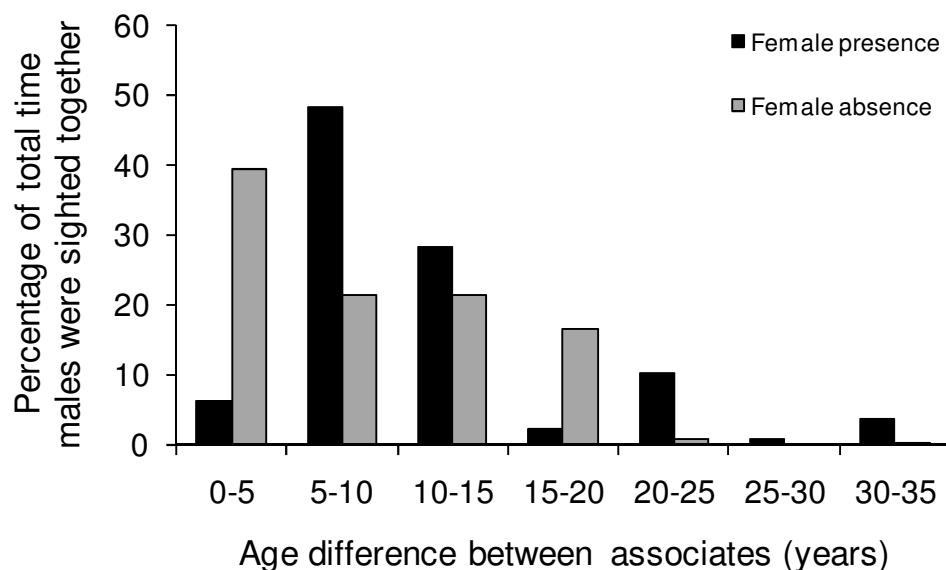

18  
19  
20 Figure 2. Percentage of total time in female presence and absence that males of various age  
21 differences spent together.

22  
23

1 While there were interesting differences between the *amounts* of time males spent with  
2 others of the same or different age class in female presence and absence, the logit  
3 *proportion* of time that males (who were sighted on  $\geq 5$  days and were seen both in female  
4 presence and absence during that time;  $N=42$ ) spent associating with other males of any age-  
5 class was not affected by female presence or male age (ANCOVA: Female presence:  
6  $F_{1,81}=1.788$ ,  $P=0.185$ ; Age:  $F_{1,81}=0.822$ ,  $P=0.367$ ; same results with untransformed data,  
7 see Supplementary material 5). Males spent (average  $\pm$  SD)  $0.232 \pm 0.241$  of their time in  
8 female presence and  $0.157 \pm 0.146$  of their time in female absence with other males.  
9 Contrary to expectation, old males did not spend a significantly smaller proportion of their  
10 time in female absence associating with other old males (average  $\pm$  SD =  $0.110 \pm 0.149$ )  
11 than the corresponding proportion of their time young males spent associating with other  
12 young males (average  $\pm$  SD =  $0.120 \pm 0.088$ ) (Mann-Whitney U test:  $N_{Young}=22$ ,  $N_{Old}=18$ ,  
13 males seen on  $\geq 5$  days in female absence used,  $U=152.000$ ,  $Z_{adj}=-1.254$ ,  $P=0.219$ ). We had  
14 also expected (in the case of social learning) that the proportion of young males' time that  
15 was spent with old males might be higher than that spent with young males. However, we  
16 found that the proportions of their time young males spent with other young males (average  
17  $\pm$  SD: female presence:  $0.117 \pm 0.104$ ; female absence:  $0.120 \pm 0.088$ ) were not  
18 significantly different from the proportions they spent with old males (average  $\pm$  SD: female  
19 presence:  $0.110 \pm 0.117$ ; female absence:  $0.110 \pm 0.136$ ) both in female presence and  
20 absence (Wilcoxon's matched-pairs test: female presence:  $N=19$  young males seen on  $\geq 5$   
21 days in female presence,  $T=68.000$ ,  $Z=0.402$ ,  $P=0.687$ ; Female absence:  $N=22$  young males  
22 seen on  $\geq 5$  days in female absence,  $T=104.000$ ,  $Z=0.400$ ,  $P=0.689$ ).

23

#### 24 Effect of age and female presence/absence on male group size

25 The group size distributions of multi-male groups that we observed in female presence and  
26 absence were small in general with a mode of 2 (~85% of the observations, see  
27 Supplementary material 6). The modal experienced group size (counted as the number of  
28 adult males) was 1 (Supplementary material 6). The average of group sizes experienced by  
29 individual adult males (seen on  $\geq 5$  days in female presence and absence,  $N_{Young}=18$ ,  
30  $N_{Old}=15$ ) was calculated for males of different age-classes in female presence and absence.  
31 While there was a small tendency for the average group sizes experienced by old males  
32 (average  $\pm$  SD: female presence:  $1.195 \pm 0.182$ ; female absence:  $1.175 \pm 0.190$ ) to be  
33 slightly smaller than those experienced by young males (average  $\pm$  SD: female presence:  
34  $1.221 \pm 0.161$ ; female absence:  $1.244 \pm 0.177$ ), they were not statistically different. The

1 average experienced group size was not affected by female presence, age-class of the male,  
2 or their interaction (Factorial ANOVA: female presence:  $F_{1,62}=0.002$ ,  $P=0.968$ ; age-class:  
3  $F_{1,62}=1.196$ ,  $P=0.278$ ; interaction:  $F_{1,62}=0.248$ ,  $P=0.620$ ; Figure 3).

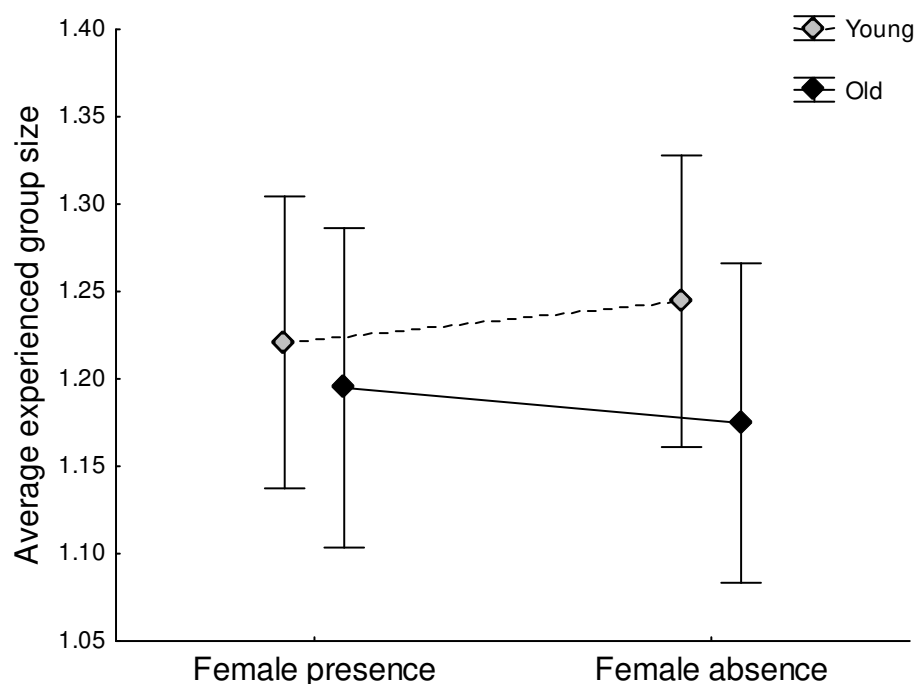

6  
7 Figure 3. Average experienced group size (number of adult males) experienced by common  
8 males of both age-classes, in female presence and absence. Error bars are 95% CI.

### 11 Effect of male age and female presence or absence on social networks

12 We found that the association network of adult males in female presence was not  
13 significantly different from a random network ( $\chi^2=0.965$ ,  $P=0.326$ ) but the network in  
14 female absence was significantly different from random ( $\chi^2=26.552$ ,  $P<0.001$ , Figure 4),  
15 with some males having a lower degree than expected and others having a greater degree  
16 than expected in female absence (Supplementary material 7). Based on the sampled  
17 randomisation test (using the same 33 common males seen in female presence (19,297  
18 minutes) and absence (46,289 minutes)), the average clustering coefficient and density were  
19 higher in female absence than in female presence and the average path length was lower in  
20 female absence than in female presence (Table 2), suggesting a more highly connected male  
21 network in female absence than in female presence.

1

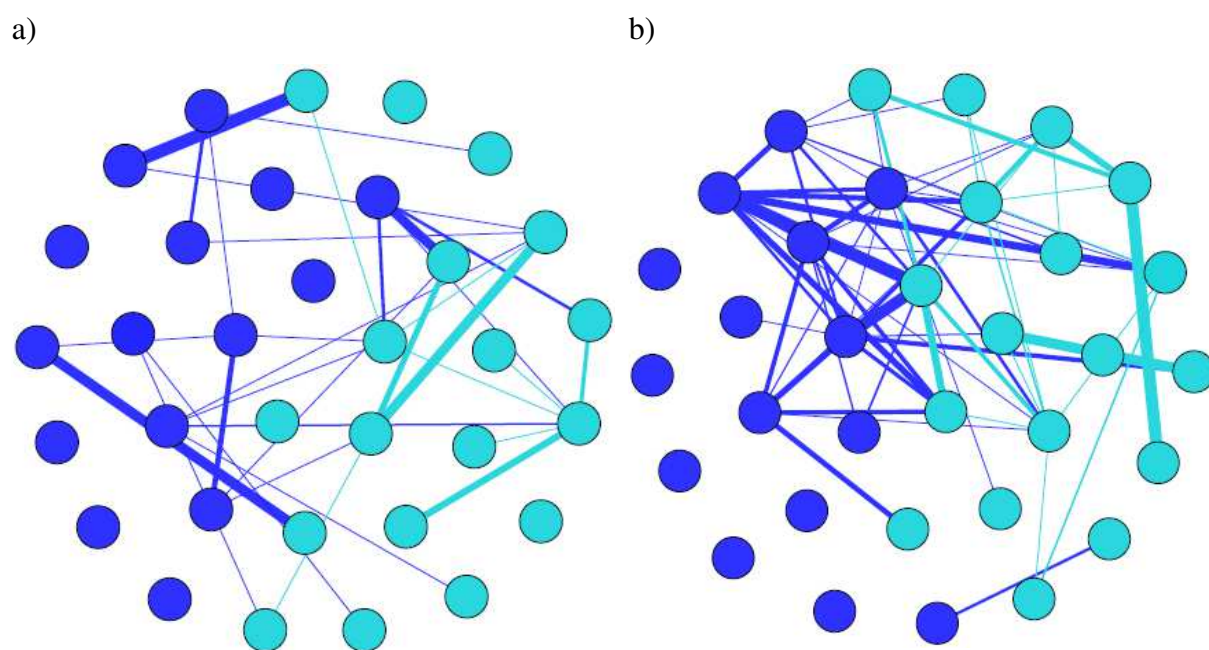

2

3 Figure 4. Undirected association networks of adult males (33 males seen on  $\geq 5$  different  
4 days each in female presence and absence) in a) female presence and b) female absence.

5 Nodes representing males  $\geq 30$  years are coloured dark blue and those representing 15-30  
6 year old males are coloured light blue. The thickness of the edge is proportional to the  
7 strength (AI value) of that connection.

8

9

10 Table 2. Network statistics based on observed and permuted male associations in female  
11 presence and female absence.  $P = (\text{number of times difference}_{\text{random}} \geq \text{difference}_{\text{observed}}) /$   
12 number of randomisations (10,000). Significant  $P$  values are marked in bold.

13

| Category                           | Ave. clustering coefficient | Ave. path length | Density        |
|------------------------------------|-----------------------------|------------------|----------------|
| Female presence observed           | 0.234                       | 2.967            | 0.063          |
| Female absence observed            | 0.588                       | 2.061            | 0.129          |
| Female presence permuted ave. (SD) | 0.626 (0.0250)              | 2.005 (0.0831)   | 0.156 (0.0030) |

| Female absence<br>permuted ave. (SD) | 0.644 (0.0168)    | 2.037 (0.0788)    | 0.163 (0.0017)    |
|--------------------------------------|-------------------|-------------------|-------------------|
| <i>P</i> value                       | <b>&lt;0.0001</b> | <b>&lt;0.0001</b> | <b>&lt;0.0001</b> |

1  
2  
3 Based on the sampled randomisation test, the average degree between old males, that  
4 between young males, and that between young and old males were all higher in female  
5 absence than in female presence (Figure 5). This was in keeping with the greater amount of  
6 time spent by males belonging to all these three combinations in female absence than in  
7 female presence (Figure 1 a,b). The degree/time, when compared for the same 33 common  
8 males, was not different between female presence and absence (Wilcoxon’s matched-pairs  
9 test:  $T= 189.000$ ,  $z=0.319$ ,  $P=0.750$ ). Thus, the greater number of associates in female  
10 absence ensued from the greater amount of time spent in female absence since the group  
11 size distributions were also not different between female presence and absence  
12 (Supplementary Material 6). Based on the sampled randomisation test, the AIs between old  
13 males were statistically significantly higher in female absence than in female presence while  
14 the AIs between young males and those between young and old males were statistically  
15 significantly higher in female presence than in female absence (Supplementary Material 8).  
16 However, the absolute differences in AI values were too small to draw biological inferences.  
17 AI values were low overall, being mostly close to zero, with only a few pairs of males that  
18 showed AI values greater than 0.05 (there were none above 0.07; see Supplementary  
19 Material 8).  
20  
21

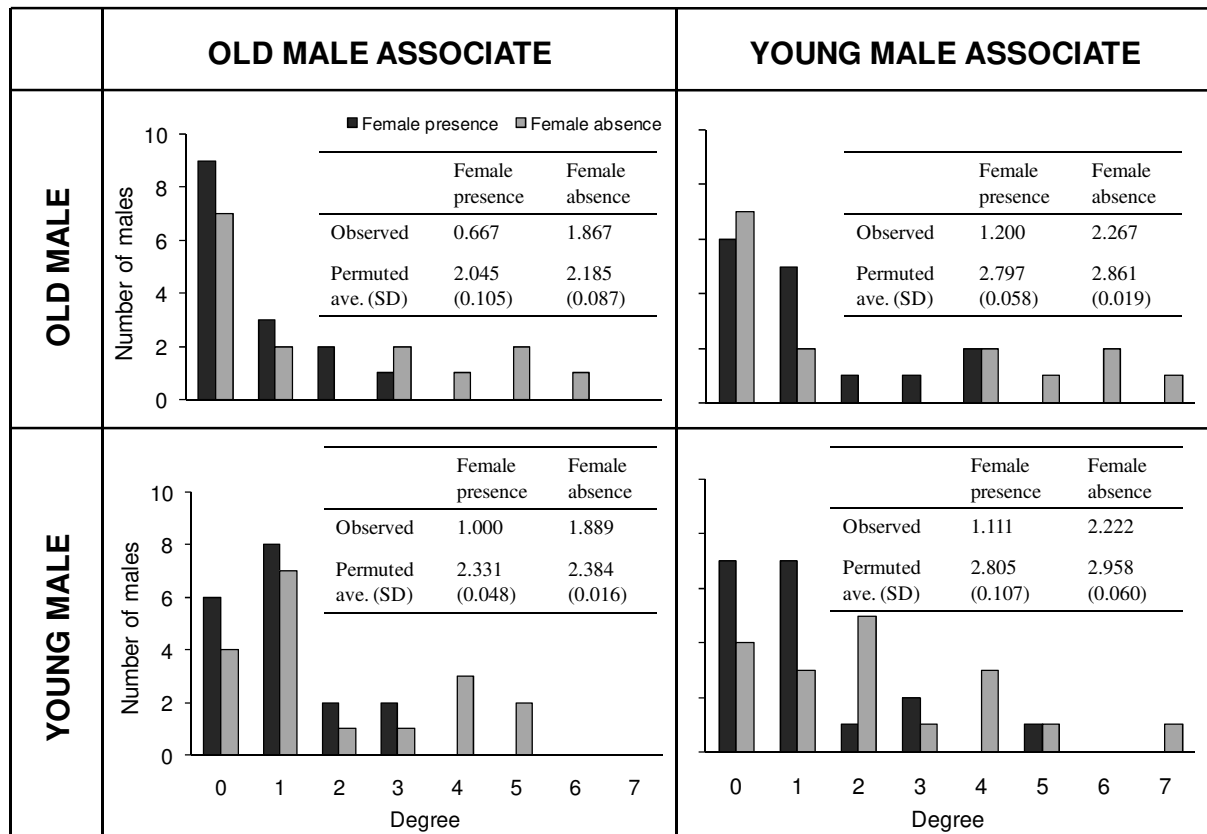

1  
2  
3  
4  
5  
6  
7  
8  
9  
10  
11  
12  
13  
14  
15  
16  
17  
18

Figure 5. Degree distributions in female presence and absence of (clockwise from top left) old males with old males, old males with young males, young males with young males and young males with old males. The average degrees, based on the observed and permuted datasets, are shown inside each panel. The observed degrees were significantly greater in female absence than in female presence in all four categories ( $P < 0.001$ ).

The three measures of centrality that we calculated were significantly correlated amongst themselves (see Supplementary material 9). Therefore, we used just one measure – closeness centrality. We correlated closeness centrality, clustering coefficient, and degree/time seen with male age. Closeness centrality and clustering coefficient were not significantly correlated with male age in either female presence or absence. Degree/time was not significantly correlated with male age in female presence, but was negatively correlated with male age in female absence (see Table 3).

1 Table 3. Results of Spearman's rank-order correlations between closeness centrality,  
 2 clustering coefficient, and degree/time with male age. The  $P$  value for significance is  $<0.008$   
 3 (flat Bonferroni correction for six comparisons). Significant correlations are marked in bold.  
 4

| Network statistic      | Female presence<br>( $N=33$ )       | Female absence<br>( $N=33$ )                                                  |
|------------------------|-------------------------------------|-------------------------------------------------------------------------------|
| Closeness centrality   | $R=-0.005$ , $R^2<0.001$ , $P>0.05$ | $R=-0.086$ , $R^2=0.007$ , $P>0.05$                                           |
| Clustering coefficient | $R=-0.041$ , $R^2=0.002$ , $P>0.05$ | $R=-0.342$ , $R^2=0.117$ , $P>0.05$                                           |
| Degree/time            | $R=-0.030$ , $R^2=0.001$ , $P>0.05$ | <b><math>R=-0.461</math>, <math>R^2=0.212</math>, <math>P&lt;0.007</math></b> |

5

6

7 *Preferred male associations and stability of associations*

8 In keeping with the low AIs between males (see Supplementary Material 8), we found no  
 9 evidence of preferred male associations across 14-day sampling periods in female presence.  
 10 In female absence, the CV of all AI values and the SD of non-zero AI values of the real  
 11 dataset were significantly higher than those of the randomised datasets, but the CV of non-  
 12 zero AI values and SD of all AI values were not significantly different between the observed  
 13 and randomised datasets (Supplementary material 10). AI values of top associates were  
 14 significantly higher than those of other associates in all combinations of age-class and  
 15 female presence and absence, except for old associates of old males in female presence, for  
 16 which the sample size was very small (Table 4).

17

18 Mantel tests showed no significant correlation between association matrices across years, in  
 19 all the three comparisons in female presence and in two out of the three comparisons in  
 20 female absence (Supplementary material 11).

21

22

23 Table 4. Mann-Whitney  $U$  test results, comparing AI values with top associates to AI values  
 24 with other associates, for all combinations of age-classes, in female presence and female  
 25 absence. The median AI values of top associates and median AI values of other associates



1 are shown for the different categories. *P* value for significance is 0.008 (flat Bonferroni  
 2 correction for 8 tests). Significant values are marked in bold.

3

|                                    | Female presence                                         |                                       |                                                                     |                  | Female absence                                          |                                       |                                                                     |                  |
|------------------------------------|---------------------------------------------------------|---------------------------------------|---------------------------------------------------------------------|------------------|---------------------------------------------------------|---------------------------------------|---------------------------------------------------------------------|------------------|
|                                    | <i>N</i> <sub>Top</sub> ,<br><i>N</i> <sub>Others</sub> | <i>U</i> ,<br><i>Z</i> <sub>adj</sub> | Median<br><i>AI</i> <sub>Top</sub> ,<br><i>AI</i> <sub>Others</sub> | <i>P</i>         | <i>N</i> <sub>Top</sub> ,<br><i>N</i> <sub>Others</sub> | <i>U</i> ,<br><i>Z</i> <sub>adj</sub> | Median<br><i>AI</i> <sub>Top</sub> ,<br><i>AI</i> <sub>Others</sub> | <i>P</i>         |
| Old associates of<br>old males     | 3, 6                                                    | 1.000,<br>-2.092                      | 0.062,<br>0.005                                                     | 0.048            | <b>9, 32</b>                                            | <b>18.500</b> ,<br><b>-3.953</b>      | <b>0.039</b> ,<br><b>0.010</b>                                      | <b>&lt;0.001</b> |
| Young associates<br>of old males   | <b>11, 29</b>                                           | <b>25.000</b> ,<br><b>-4.074</b>      | <b>0.046</b> ,<br><b>0.011</b>                                      | <b>&lt;0.001</b> | <b>8, 36</b>                                            | <b>48.000</b> ,<br><b>-2.921</b>      | <b>0.029</b> ,<br><b>0.008</b>                                      | <b>0.002</b>     |
| Old associates of<br>young males   | <b>10, 25</b>                                           | <b>33.000</b> ,<br><b>-3.359</b>      | <b>0.042</b> ,<br><b>0.008</b>                                      | <b>&lt;0.001</b> | <b>11, 33</b>                                           | <b>76.500</b> ,<br><b>-2.846</b>      | <b>0.026</b> ,<br><b>0.009</b>                                      | <b>0.003</b>     |
| Young associates<br>of young males | <b>9, 29</b>                                            | <b>10.000</b> ,<br><b>-4.140</b>      | <b>0.047</b> ,<br><b>0.011</b>                                      | <b>&lt;0.001</b> | <b>16, 55</b>                                           | <b>86.500</b> ,<br><b>-4.865</b>      | <b>0.024</b> ,<br><b>0.007</b>                                      | <b>&lt;0.001</b> |

4

5

## 6 Discussion

7

8 This is the first detailed study of non-dominant adult male associations in Asian elephants in  
 9 a relatively undisturbed natural habitat. In keeping with the strong competition expected  
 10 amongst males, we found that adult males spent only ~11% of their time in all-male groups.  
 11 As we had conjectured, the percentage of their time adult males spent in all-male groups in  
 12 Kabini was much smaller than the percentage of time adult males spent in all-male groups in  
 13 African savannah elephants (~63% in Amboseli; Chiyo *et al.* 2011). This is possibly  
 14 because of the presence of distinct “bull areas” (Poole 1982), which ‘sexually inactive’ adult  
 15 male elephants inhabit but females seldom do in the African savannah but are absent in  
 16 Kabini. Adult males may be more likely to encounter one another in such bull areas, if  
 17 present. Again, possibly because of the absence of bull areas in Kabini, adult males in  
 18 Kabini spent more time in mixed-sex groups (average=35%) than adult males in Amboseli  
 19 (average=18%; see Table 1). The percentage of time spent alone (without females or  
 20 another adult male) was greater in Kabini (~54%) than in Amboseli (~18%). Not only was  
 21 the percentage of time spent in all-male groups lower in Kabini than in African savannah

1 elephants, but the group size experienced in all-male groups was also lower in Kabini  
2 (average  $\pm$  SD group size of all-male groups with more than one male: Kabini:  $2.100 \pm$   
3  $0.328$ , Amboseli:  $3.325 \pm 1.995$ ; Supplementary material 12). Female group sizes have been  
4 found to be constrained in the Kabini population (Nandini *et al.* 2017) compared to an  
5 African savannah elephant population (Nandini *et al.* 2018) and it is possible that the adult  
6 males, being larger, experience an even greater restriction on their group sizes (including  
7 solitary males, the average group size of adult males was 1.1 in Kabini). The relative extents  
8 to which the presence/absence of bull areas and differences in feeding competition in non-  
9 bull areas explain differences in group size and association time between adult males in the  
10 African savannah and Kabini would be interesting to examine.

11  
12 We had expected older males to spend more time with female groups to acquire mating  
13 opportunities and less time in all-male groups, but found that there was no effect of male  
14 age on the proportion of time spent in mixed-sex groups or all-male groups. The greater  
15 nutritional requirement of larger, older males may lead to greater costs to feeding in the  
16 presence of female groups, resulting in older males not being able to increase their time  
17 spent with female groups. We had expected older males to form smaller group sizes than  
18 younger males if there was a constraint on group size due to feeding costs, but the average  
19 experienced group sizes were close to 1.2, precluding much further reduction in group sizes.  
20 Adult males of older age-classes (35+ years of age) had been sighted more frequently with  
21 female groups than adult males of younger age-classes (15-25 and 25-35 year age-classes)  
22 during a study in the neighbouring Mudumalai Wildlife Sanctuary (Daniel *et al.* 1987),  
23 which has tall grass (that elephants feed upon) areas and greater grass biomass (Sivaganesan  
24 1991, Baskaran *et al.* 2010) than in our study area (Gautam *et al.* 2017). However, the  
25 average group size of adult males (including solitary males) was only 1.1 in Mudumalai  
26 Wildlife Sanctuary also (Daniel *et al.* 1987), as in our study. The maximum all-male group  
27 size was 2 in Mudumalai (Daniel *et al.* 1987) compared to the maximum group size of 6 we  
28 observed in Kabini. However, the latter was observed only for 65 minutes (0.13% of the  
29 total female absence time), therefore, it is not surprising that a shorter study may not have  
30 observed these larger groups. A maximum adult male group size of 5 was observed in Gal  
31 Oya in Sri Lanka (McKay 1973) and the maximum group size in Amboseli was 18 (Chiyo  
32 *et al.* 2011). In Sri Lanka, McKay (1973) also found that the percentages of female-absence  
33 sightings in which only one adult male was present were 80.80% in Gal Oya and 82.11% in  
34 Ruhuna, similar to that in Kabini (average  $\pm$  SD:  $84.53 \pm 14.56\%$ ,  $N=43$  males sighted on 5

1 days or more). This was only 60.58% in Lahugala, Sri Lanka, in which female herds were  
 2 larger and male group size was also larger (average  $\pm$  SD:  $1.765 \pm 0.354$ ) than in Gal Oya  
 3 ( $1.273 \pm 0.441$ ) and Yala ( $1.203 \pm 0.227$ ) (McKay 1973).

4

5

6 Table 5. A comparison of time spent in different group types by adult males in the study  
 7 population with that in Amboseli National Park (data from Chiyo *et al.* 2011).

8

|                                                                       | Amboseli<br>(ave. $\pm$ sd) | Kabini<br>(ave. $\pm$ sd) |
|-----------------------------------------------------------------------|-----------------------------|---------------------------|
| Percentage of time spent alone<br>(1 adult male)                      | $18.39 \pm 11.61$           | $54.38 \pm 21.55$         |
| Percentage of time spent in all-<br>male groups<br>( $>1$ adult male) | $63.24 \pm 18.68$           | $10.55 \pm 10.61$         |
| Percentage of time spent in<br>mixed-sex groups                       | $18.36 \pm 16.42$           | $35.06 \pm 23.11$         |

9

10

### 11 *Reasons for adult male associations*

12 While adult males spent a smaller proportion of time with each other than they did with  
 13 females or solitarily, the amount of time they spent with other males was not in keeping  
 14 with random expectation, suggesting that these associations were biologically meaningful.  
 15 We had hypothesised that all-male groups could provide an opportunity for younger males  
 16 to learn from older males or for males to test strengths against each other (learning about  
 17 their relative dominance status, instead of resources). The former, social learning  
 18 hypothesis, was based on the expectation that the superior knowledge of experienced, older  
 19 males might facilitate younger males to learn about the location of food resources in the  
 20 absence of females, and about interactions with females in the presence of females. Based  
 21 on our observations in Kabini, we did not find support for the former. Contrary to the  
 22 expectations based on the social learning hypothesis, we found that young males did not  
 23 spend a higher proportion of their time with old males than with other young males, in  
 24 female presence and absence. We also found that males spent a greater absolute amount of  
 25 time with their age-class peers and less time with males from the other age-class in female

1 absence. Old and young males did not spend more time together than expected in female  
2 presence either. During the small amount of time that old and young males spent together,  
3 both age classes were equally likely to approach the other to associate, both in female  
4 presence and absence. Therefore, young males did not seek out old males. Moreover, the  
5 centrality, clustering coefficient and the number of associates of older males in the male  
6 social network were not higher than those of younger males, either in female absence or  
7 presence. In fact, in female absence, older males had fewer associates after controlling for  
8 the time they were sighted. This could be a consequence of old males possibly needing to  
9 clarify their dominance relationships with fewer males in their age class, due to a  
10 combination of previous experience and better knowledge of their strengths. In fact, we  
11 found that, in female absence, common older males, who might be familiar with one  
12 another, met each other at random while common younger males still preferentially  
13 associated with each other (Supplementary material 4). However, when rarer, possibly  
14 unfamiliar, males were included, both age-classes spent more time with their age-peers than  
15 expected as mentioned above.

16  
17 Contrary to our finding that social learning from old males did not appear to be important in  
18 male associations, older males spent more time with other males in the Amboseli African  
19 savannah elephant population (Poole 1982, Chiyo *et al.* 2011). Older males also had a  
20 greater number of associates in all-male groups in the Amboseli population (Chiyo *et al.*  
21 2011) and showed significant affiliation with a higher proportion of available dyads when  
22 they were sexually inactive in the Samburu population (Goldenberg *et al.* 2014), when  
23 compared to younger males. Old males had higher Eigenvector centrality in association  
24 networks based on all-male groups in Amboseli (Chiyo *et al.* 2011), although when males  
25 were classified based on their sexual state (sexually active and sexually inactive) in the  
26 Samburu population, there was no correlation between centrality and age in sexually  
27 inactive networks and a negative correlation between centrality and age in sexually active  
28 networks (Goldenberg *et al.* 2014). Male associations were also shown to facilitate social  
29 learning; males who had an older crop raider as a top associate were seen to be more likely  
30 to raid themselves (Chiyo *et al.* 2012). Older African savannah elephant males were  
31 preferred as associates by males of all ages in Okavango Delta, Botswana also (Evans and  
32 Harris 2008) and have been considered analogous to the knowledgeable matriarchs of  
33 female groups in the species (McComb *et al.* 2001, Evans and Harris 2008). The greater  
34 social role of older males in the African savannah elephant compared to the Asian elephant

1 in female absence may stem from differences in the habitats they occupy. Asian elephants  
2 occupy moister, more forested habitats, in which food is possibly more dispersed and  
3 unpredictable in space (but not time) on a local scale. This might make it difficult to obtain  
4 knowledge about resources and their distributions. In our study population, matriarchs of  
5 female clans have also not been found to be the most central individuals (Shetty 2016),  
6 which has also been suggested in Uda Walawe in Sri Lanka (de Silva *et al.* 2011). However,  
7 while group size constraints were found to result in clans being split among small groups  
8 (Nandini *et al.* 2017), which may result in the matriarch not being central to the clan, group  
9 size constraint alone may not lead to the pattern we see amongst males. When males  
10 associated in small group sizes, they preferred their age-class peer to older age-class males,  
11 and young males did not preferentially approach old males when associations did occur.  
12 Therefore, it appears that social learning was not the main reason for adult male  
13 associations, even accounting for possible limitations on group size.

14

15 Instead, with young and old males spending more time than expected with their age-class  
16 peers in female absence, and young males spending more time than expected with their age-  
17 class peers in female presence also, it appears that male associations may allow for bonding  
18 within the age-class and settling of close dominance ranks while (in the case of young  
19 males) avoiding potentially costly interactions with the larger, older males. Associations  
20 between adult males were stronger when the age differences between them were smaller in  
21 Amboseli also, though the relationship was weak (Chiyo *et al.* 2011). Males also picked  
22 sparring partners who were closer to their own age. In Samburu, the males who associated  
23 when sexually inactive were closer in age than the males who associated when sexually  
24 active (Goldenberg *et al.* 2014). This indicates that competitor assessment through spending  
25 time with age-peers is also a component of all-male groups / sexually inactive associations  
26 of African savannah elephant males. The social preference hypothesis (Bon and Campan  
27 1996, Ruckstuhl and Neuhaus 2000), posited first in the context of ungulates, suggested that  
28 individuals with similar social motivations are behaviourally compatible with each other and  
29 hence remain in the same groups while individuals that are behaviourally incompatible  
30 become segregated socially, leading to i) sexual segregation between males and females and  
31 ii) age/size based segregation among males. Thus, similar-aged males, who share social  
32 motivations, are expected to form all-male groups. Similar-aged males have been shown to  
33 preferentially associate with each other and test strengths in all-male groups of other species  
34 (Villaret and Bon 1995 - Alpine ibex, Cransac *et al.* 1998 - mouflon sheep, Bon *et al.* 2001 -

1 Alpine ibex). It would be interesting to examine the identities of sparring partners amongst  
2 males and the establishment of a dominance hierarchy, if any, in the Kabini population.

3

#### 4 *Effect of female presence on adult male associations*

5 We found that the association network of males was non-random in female absence but  
6 random in female presence. The former association network showed higher density and  
7 average clustering coefficient than the latter. This was similar to the finding in African  
8 savannah elephants in Samburu, of association networks of sexually inactive males being  
9 denser and more clustered than those of sexually active males (Goldenberg *et al.* 2014). In  
10 our study, males were said to be associating in female presence when they visited the same  
11 female group at the same time. Therefore, it is possible that the associations we observe here  
12 are a combination of active association/avoidance and males visiting female groups  
13 independent of each other and happening to associate with random males at female groups,  
14 leading to the random male association network in female presence. Similar to the lower age  
15 differences between associates in female absence when compared to female presence in  
16 Kabini, age differences between significant associates in the sexually inactive state were  
17 smaller than those in the sexually active state in Samburu (Goldenberg *et al.* 2014). We  
18 found that neither the group size (of males) that males experienced, nor the proportion of  
19 time spent associating with other adult males was different between female presence and  
20 absence. However, the number of associates, time spent together and the strength of  
21 associations were strikingly different between female presence and absence when examined  
22 based on the age-classes of males. Old males ( $\geq 30$  years old) who were reproductively  
23 competitive preferred spending time with age-peers in female absence while avoiding  
24 spending time with each other in female presence, and met more numbers of other old males  
25 in female absence than in female presence. Thus, associations among this age-class  
26 conformed to our expectations of the effect of female presence on adult associations, with  
27 males viewing each other as competition and avoiding each other while in the presence of  
28 the resource they are competing over. Young males (15-30 years old), however, spent more  
29 time with age-peers than expected by chance both in female presence and absence and met  
30 more numbers of each other in female absence. This suggests that young males may not  
31 view each other as competition, even in female presence. The two age-classes avoided each  
32 other in female absence while the time males of different age-classes spent together was not  
33 different from random in female presence. Avoidance between old males but not between an  
34 old and young male in female presence suggests that old males do not consider young males

1 a threat and, hence, tolerate the presence of younger males in female presence. As young  
2 adults are sexually mature and capable of mating, this tolerance may provide an opportunity  
3 for young males to attain sneak matings (seen in Amboseli by Poole 1989, Kaziranga by  
4 Chelliah and Sukumar 2015, Kabini Elephant Project, unpublished data). Males modulating  
5 their affiliations towards other males in multi-male mixed sex groups based on their own  
6 and their associate's age has been observed in other species, such as the Ursine colobus  
7 (Teichroeb *et al.* 2013). We would expect male-male tolerance in elephants (when males  
8 associate very temporarily with female groups) to be affected by the dominance  
9 relationships between the males and female choice. If females resist mounting attempts by  
10 younger males (see Chelliah and Sukumar 2015), and larger, older males are dominant over  
11 smaller, younger males (see Chelliah and Sukumar 2013) a young male associating with the  
12 same female group would be inexpensive to tolerate for an old male, whereas the young  
13 male might still have a non-zero probability of attaining a sneak mating.

14

#### 15 *Stability and non-randomness of associations*

16 We did not find high correlations between associations across years, both in female  
17 presence and absence. When we tested for preferred associations/avoidances across 14-day  
18 sampling periods, we obtained some, but not unequivocal, evidence for preferred  
19 associations in female absence but not in female presence. There was also some evidence  
20 that, with the exception of old male-old male associations in female presence, males of both  
21 age-classes had one significant associate of the same and the other age-class, both in female  
22 presence and absence. Adult all-male groups of African savannah elephants in Serengeti and  
23 Amboseli National Parks were also found to change in composition (Croze 1974, Poole  
24 1982) and less than 10% of the AI values were greater than 0.1 and were not predicted  
25 under a model of random associations in Amboseli (Chiyo *et al.* 2011). We also found AI  
26 values between males to be very small. Older (>20 years old) adult males in Amboseli were  
27 also found to have at least one significant top associate, who was usually close in age to the  
28 focal male (Lee *et al.* 2011), similar to what we found in Kabini. Thus, in African savannah  
29 elephants, there is evidence for associations based on social learning from older males, and  
30 some (weak) support for testing strength against age-peers and kinship in all-male groups.  
31 The smaller time spent by Kabini males in all-male groups, in comparison to the African  
32 savannah elephant (see Table 1) may result from a combination of no bull-areas, possible  
33 constraints on group size, and fewer reasons to associate (social learning does not seem to  
34 be a primary reason). Stable and significant affiliation among adult males have been

1 observed in many species (Packer and Pusey 1982 - lions, Connor *et al.* 2001 - bottlenose  
2 dolphins, de Villiers *et al.* 2003 - African wild dogs, Mitani 2009 - chimpanzees, Berghänel  
3 *et al.* 2011 - barbary macaques) but these relationships are usually thought to be a means to  
4 form coalitions to defend females. Adult male coalitions have not been observed in Asian  
5 elephants and are unlikely, given the low probability of finding a receptive female and the  
6 small sizes of female groups (Nandini *et al.* 2017). It will be interesting to explore other  
7 possible reasons for the significant affiliations we find amongst males. It is possible that  
8 these males are related (see Vidya and Sukumar 2005) but familiarity could also influence  
9 male associations. While our study was carried out within Protected Areas, some of our  
10 elephants move outside the park limits and raid crops. Crop raiding is risky and male groups  
11 may be formed when they raid crops in risky situations (see Srinivasaiah *et al.* 2012). Our  
12 results apply to situations with little anthropogenic interference.

13  
14 Thus, we show that associations among adult male Asian elephants are not always  
15 competitive and were affected by their age and immediate presence of females. Social  
16 learning from older males did not seem to have a large effect on these associations and  
17 associations with age-peers likely allow for testing strengths. The role of kinship in male  
18 associations remains to be explored. When we compared our results to those observed in  
19 African savannah elephants, we found that Kabini males spent a much smaller proportion of  
20 their time in all-male groups of smaller sizes, making their associations weaker, and that  
21 older males had a more limited role in male association networks. We posit that the  
22 difference in the role of older males is due to the difference in the dispersion of food  
23 resources in habitats they occupy, making accumulated knowledge of resources, that older  
24 males possess, less valuable in Asian elephants. Thus ecological differences possibly result  
25 in the differences in male social structure between the two species, despite phylogenetic  
26 similarity.

27

28

## 29 **Acknowledgments**

30

31 This work was funded by the Department of Science and Technology's (Government of  
32 India) Ramanujan Fellowship (to TNCV) under Grant No. SR/S2/RJN-25/2007 (dated  
33 09/06/2008), Council of Scientific and Industrial Research, Government of India, under  
34 Grant No. 37(1375)/09/EMR-II and No. 37(1613)/13/EMR-II, National Geographic Society,



1 USA, under Grant #8719-09 and #9378-13, and JNCASR. PK was supported as a Ph.D.  
2 student by the Council of Scientific and Industrial Research (No. 09/733(0152)/2011-EMR-  
3 D). This work is part of PK's Ph.D. thesis. JNCASR also provided logistic support. The  
4 funders had no role in study design, data collection and analysis, preparation of the  
5 manuscript, or decision to publish.

6  
7 We thank the offices of the PCCF, Karnataka Forest Department, and of the Conservators of  
8 Forests of Nagarhole and Bandipur National Parks and Tiger Reserves for field permits.  
9 We also thank various officials, from various PCCFs and APCCFs, to the Conservators of  
10 Forests and Range Forest Officers, to the staff of Nagarhole and Bandipur National Parks  
11 for their support across the years. We thank Krishna, Althaf, Ranga, Shankar, Gunda,  
12 Rajesh, Binu, and others for field assistance. We thank Deepika Prasad and Arjun Ghosh for  
13 help with the initial field data collection. We thank Ajay Desai for useful discussions.

## 16 **References**

- 18 1. AERCC (2006). Southern India Elephant Census 2005. Report submitted to the  
19 Karnataka Forest Department. Asian Elephant Research and Conservation Centre,  
20 Bangalore, India.
- 21 2. Baskaran N, Balasubramanian M, Swaminathan S and Desai AA (2010). Feeding  
22 ecology of the Asian elephant *Elephas maximus Linnaeus* in the Nilgiri Biosphere  
23 Reserve, southern India. *Journal of the Bombay Natural History Society* 107: 3-13.
- 24 3. Baskaran N, Varma S, Sar CK and Sukumar R (2011). Current status of Asian elephants  
25 in India. *Gajah* 35: 47-54.
- 26 4. Bastian M, Heymann S and Jacomy M (2009). Gephi: an open source software for  
27 exploring and manipulating networks. *Proceedings of the Third International ICWSM*  
28 *Conference* 8: 361-362.
- 29 5. Bejder L, Fletcher D and Bräger S (1998). A method for testing association patterns of  
30 social animals. *Animal Behaviour* 56: 719-725.
- 31 6. Berghänel A, Ostner J, Schröder U and Schülke O (2011). Social bonds predict future  
32 cooperation in male Barbary macaques, *Macaca sylvanus*. *Animal Behaviour* 81: 1109-  
33 1116.

- 1 7. Blundell GM, Ben-David M and Bowyer RT (2002). Sociality in river otters:  
2 cooperative foraging or reproductive strategies? *Behavioral Ecology* 13: 134-141.
- 3 8. Bon R and Campan R (1996). Unexplained sexual segregation in polygamous ungulates:  
4 a defense of an ontogenetic approach. *Behavioural Processes* 38: 131-154.
- 5 9. Bon R, Dubois M and Maublanc ML (1993). Does age influence between-rams  
6 companionship in mouflon (*Ovis gmelini*)? *Revue D Ecologie-La Terre Et La Vie* 48:  
7 57-64.
- 8 10. Bon R, Rideau C, Villaret JC and Joachim J (2001). Segregation is not only a matter of  
9 sex in Alpine ibex, *Capra ibex ibex*. *Animal Behaviour* 62: 495-504.
- 10 11. Bonacich P (1972). Technique for analyzing overlapping memberships. *Sociological*  
11 *Methodology* 4: 176-185.
- 12 12. Bygott JD, Bertram BC and Hanby JP (1979). Male lions in large coalitions gain  
13 reproductive advantages. *Nature* 282: 839-841.
- 14 13. Caro TM and Collins DA (1987). Male cheetah social organization and  
15 territoriality. *Ethology* 74: 52-64.
- 16 14. Chelliah K and Sukumar R (2013). The role of tusks, musth and body size in male–male  
17 competition among Asian elephants, *Elephas maximus*. *Animal Behaviour* 86: 1207-  
18 1214.
- 19 15. Chelliah K and Sukumar R (2015). Interplay of male traits, male mating strategies and  
20 female mate choice in the Asian elephant, *Elephas maximus*. *Behaviour* 152: 1113-  
21 1144.
- 22 16. Chiyo PI, Archie EA, Hollister-Smith JA, Lee PC, Poole JH, Moss CJ and Alberts SC  
23 (2011). Association patterns of African elephants in all-male groups: the role of age and  
24 genetic relatedness. *Animal Behaviour* 81: 1093-1099.
- 25 17. Chiyo PI, Moss CJ and Alberts SC (2012). The influence of life history milestones and  
26 association networks on crop-raiding behavior in male African elephants. *PloS One* 7:  
27 e31382.
- 28 18. Connor RC, Smolker RA and Richards AF (1992). Two levels of alliance formation  
29 among male bottlenose dolphins (*Tursiops* sp.). *Proceedings of the National Academy of*  
30 *Sciences* 89: 987-990.
- 31 19. Connor RC, Heithaus MR and Barre LM (2001). Complex social structure, alliance  
32 stability and mating access in a bottlenose dolphin ‘super-alliance’. *Proceedings of the*  
33 *Royal Society of London B: Biological Sciences* 268: 263-267.

- 1 20. Cransac N, Gerard JF, Maublanc ML and Pépin D (1998). An example of segregation  
2 between age and sex classes only weakly related to habitat use in mouflon sheep (*Ovis*  
3 *gmelini*). *Journal of Zoology* 244: 371-378.
- 4 21. Croze H (1974). The Seronera bull problem: the elephants. *African Journal of*  
5 *Ecology* 12: 1-27.
- 6 22. Curé C, Antunes R, Alves AC, Visser F, Kvadsheim PH and Miller PJ (2013).  
7 Responses of male sperm whales (*Physeter macrocephalus*) to killer whale sounds:  
8 implications for anti-predator strategies. *Scientific Reports* 3: 1579.
- 9 23. Daniel JC, Desai AA, Sivaganesan N and Rameshkumar S (1987). *Study of the ecology*  
10 *of some endangered species of wildlife and their habitat- The Asian elephant*. Bombay:  
11 Bombay Natural History Society.
- 12 24. de Silva S, Ranjeewa AD and Kryazhimskiy S (2011). The dynamics of social networks  
13 among female Asian elephants. *BMC Ecology* 11: 17.
- 14 25. de Silva S and Wittemyer G (2012). A comparison of social organization in Asian  
15 elephants and African savannah elephants. *International Journal of Primatology* 33:  
16 1125-1141.
- 17 26. de Villiers MS, Richardson PR and Van Jaarsveld AS (2003). Patterns of coalition  
18 formation and spatial association in a social carnivore, the African wild dog (*Lycaon*  
19 *pictus*). *Journal of Zoology*, 260: 377-389.
- 20 27. Desai AA and Johnsingh AJT (1995). Social organization and reproductive strategy of  
21 the male Asian elephant (*Elephas maximus*). In: Daniel JC and Datye H (eds), *A week*  
22 *with elephants*, Bombay Natural History Society, Oxford University Press, pp. 532-532.
- 23 28. Eisenberg JF, McKay GM and Jainudeen MR (1971). Reproductive behavior of the  
24 Asiatic elephant. *Behaviour* 38: 193-224.
- 25 29. Erdős P and Rényi A (1960). On the evolution of random graphs. *Publications of the*  
26 *Mathematical Institute of the Hungarian Academy of Sciences* 5: 17-61.
- 27 30. Evans KE and Harris S (2008). Adolescence in male African elephants, *Loxodonta*  
28 *africana*, and the importance of sociality. *Animal Behaviour* 76: 779-787.
- 29 31. Fischhoff IR, Dushoff J, Sundaresan SR, Cordingley JE and Rubenstein DI (2009).  
30 Reproductive status influences group size and persistence of bonds in male plains zebra  
31 (*Equus burchelli*). *Behavioral Ecology and Sociobiology* 63: 1035-1043.
- 32 32. Fitzpatrick JL, Almbro M, Gonzalez-Voyer A, Kolm N and Simmons LW (2012). Male  
33 contest competition and the coevolution of weaponry and testes in  
34 pinnipeds. *Evolution* 66: 3595-3604.

- 1 33. Gautam H, Potdar GG and Vidya TNC (2017). Using visual estimation of cover for  
2 rapid assessment of graminoid abundance in forest and grassland habitats in studies of  
3 animal foraging. *Phytocoenologia* 47: 315-327.
- 4 34. Goldenberg SZ, de Silva S, Rasmussen HB, Douglas-Hamilton I and Wittemyer G  
5 (2014). Controlling for behavioural state reveals social dynamics among male African  
6 elephants, *Loxodonta africana*. *Animal Behaviour* 95: 111-119.
- 7 35. Greenwood PJ (1980). Mating systems, philopatry and dispersal in birds and  
8 mammals. *Animal Behaviour* 28: 1140-1162.
- 9 36. Hill DA and Van Hooff JA (1994). Affiliative relationships between males in groups of  
10 nonhuman primates: a summary. *Behaviour* 130: 143-149.
- 11 37. Keerthipriya P, Nandini S, Gautam H, Revathe T and Vidya TNC (2018). Musth and its  
12 effects on male-male and male-female associations in Asian elephants in Nagarahole-  
13 Bandipur, southern India. Submitted.
- 14 38. Latapy M (2008). Main-memory triangle computations for very large (sparse (power-  
15 law)) graphs. *Theoretical Computer Science* 407: 458-473.
- 16 39. Lee PC, Poole JH, Njiraini N, Sayialel CN and Moss CJ (2011). Male social dynamics:  
17 Independence and beyond. In: Moss CJ, Croze H and Lee PC (eds), *The Amboseli*  
18 *Elephants: a Long-Term Perspective on a Long-Lived Mammal*, University of Chicago  
19 Press, Chicago, pp. 224-237.
- 20 40. Lettevall E, Richter C, Jaquet N, Slooten E, Dawson S, Whitehead H, Christal J and  
21 Howard PM (2002). Social structure and residency in aggregations of male sperm  
22 whales. *Canadian Journal of Zoology* 80: 1189-1196.
- 23 41. Mantel N (1967). The detection of disease clustering and a generalized regression  
24 approach. *Cancer Research* 27: 209-220.
- 25 42. MATLAB Release 2011a. Natick: The MathWorks, Inc; 2011.
- 26 43. McComb K, Moss C, Durant SM, Baker L and Sayialel S (2001). Matriarchs as  
27 repositories of social knowledge in African elephants. *Science* 292: 491-494.
- 28 44. McKay GM (1973). Behaviour and ecology of the Asiatic elephant in southeastern  
29 Ceylon. *Smithsonian Contributions to Zoology* 125: 1-113.
- 30 45. Mitani JC (2009). Male chimpanzees form enduring and equitable social bonds. *Animal*  
31 *Behaviour* 77: 633-640.
- 32 46. Möller LM, Beheregaray LB, Harcourt RG and Krützen M (2001). Alliance membership  
33 and kinship in wild male bottlenose dolphins (*Tursiops aduncus*) of southeastern

- 1       Australia. *Proceedings of the Royal Society of London B: Biological Sciences* 268:  
2       1941-1947.
- 3       47. Mooring MS, Fitzpatrick TA, Benjamin JE, Fraser IC, Nishihira TT, Reisig DD and  
4       Rominger EM (2003). Sexual segregation in desert bighorn sheep (*Ovis canadensis*  
5       *mexicana*). *Behaviour* 140: 183-207.
- 6       48. Nandini S, Keerthipriya P and Vidya TNC (2017). Seasonal variation in female  
7       Asian elephant social structure in Nagarahole-Bandipur, southern India. *Animal*  
8       *Behaviour* 134: 135-145.
- 9       49. Nandini S, Keerthipriya P and Vidya TNC (2018). Group size differences may  
10       mask underlying similarities in social structure: a comparison of female elephant  
11       societies. *Behavioral Ecology* 29: 145-159.
- 12       50. Packer C and Pusey AE (1982). Cooperation and competition within coalitions of male  
13       lions: kin selection or game theory? *Nature* 296: 740-742.
- 14       51. Poole JH (1982). *Musth and male-male competition in the African elephant*. Doctoral  
15       dissertation, University of Cambridge.
- 16       52. Poole JH (1989). Mate guarding, reproductive success and female choice in African  
17       elephants. *Animal Behaviour* 37: 842-849.
- 18       53. Poole JH, Lee PC, Njiraini N and Moss CJ (2011). Longevity, competition and musth: a  
19       long-term perspective on male reproductive strategies. In: Moss CJ, Croze H and Lee  
20       PC (eds), *The Amboseli Elephants: A Long-Term Perspective on a Long-Lived Mammal*.  
21       University of Chicago Press, Chicago, pp. 272-290.
- 22       54. Ruckstuhl KE and Neuhaus P (2000). Sexual segregation in ungulates: a new  
23       approach. *Behaviour* 137: 361-377.
- 24       55. Saayman GS (1971). Behaviour of the adult males in a troop of free-ranging chacma  
25       baboons (*Papio ursinus*). *Folia Primatologica* 15: 36-57.
- 26       56. Schaller GB (1972). *The Serengeti lion*. University of Chicago Press, Chicago.
- 27       57. Shetty N (2016). *Social Structure, Genetic Relatedness, and Dominance Relationships*  
28       *in Female Asian Elephants in Nagarahole and Bandipur National Parks, Southern*  
29       *India*. Doctoral dissertation, JNCASR.
- 30       58. Sivaganesan N (1991). *The ecology of the Asian elephant in Mudumalai Wildlife*  
31       *Sanctuary and National Park with special reference to habitat utilization*. Doctoral  
32       dissertation, Bharathidasan University.
- 33       59. Sokal RR and Rohlf FJ (1981). *Biometry* (second edition). WH Feeman and  
34       Company, New York.

- 1 60. Srinivasaiah NM, Anand VD, Vaidyanathan S and Sinha A (2012). Usual populations,  
2 unusual individuals: insights into the behavior and management of Asian elephants in  
3 fragmented landscapes. *PloS One* 7: e42571.
- 4 61. StatSoft, Inc. (2004). STATISTICA (data analysis software system), version 7.  
5 [www.statsoft.com](http://www.statsoft.com).
- 6 62. Sukumar R (1989). *The Asian elephant: ecology and management*. Cambridge  
7 University Press.
- 8 63. Sukumar R, Joshi NV and Krishnamurthy V (1988). Growth in the Asian  
9 elephant. *Proceedings: Animal Sciences* 97: 561-571.
- 10 64. Teichroeb JA, Wikberg EC, Ting N and Sicotte P (2013). Factors influencing male  
11 affiliation and coalitions in a species with male dispersal and intense male–male  
12 competition, *Colobus vellerosus*. *Behaviour* 151: 1045-1066.
- 13 65. Van Hooff JA and Van Schaik CP (1994). Male bonds: affiliative relationships among  
14 nonhuman primate males. *Behaviour* 130: 309-337.
- 15 66. Vidya TNC, Prasad D and Ghosh A (2014). Individual Identification in Asian  
16 Elephants. *Gajah* 40: 3-17.
- 17 67. Vidya TNC and Sukumar R (2005). Social organization of the Asian elephant (*Elephas*  
18 *maximus*) in southern India inferred from microsatellite DNA. *Journal of Ethology* 23:  
19 205-210.
- 20 68. Villaret JC and Bon R (1995). Social and spatial segregation in Alpine ibex (*Capra ibex*)  
21 in Bargy, French Alps. *Ethology* 101: 291-300.
- 22 69. Wagner AP, Frank LG and Creel S (2008). Spatial grouping in behaviourally solitary  
23 striped hyaenas, *Hyaena hyaena*. *Animal Behaviour* 75: 1131-1142.
- 24 70. Wasserman S and Faust K (1994). *Social network analysis: Methods and applications*.  
25 Cambridge University Press, Cambridge and New York.
- 26 71. Waterman JM (1997). Why do male Cape ground squirrels live in groups? *Animal*  
27 *Behaviour* 53: 809-817.
- 28 72. Whitehead H (2008). *Analyzing animal societies: quantitative methods for vertebrate*  
29 *social analysis*. University of Chicago Press, Chicago.
- 30 73. Whitehead H (2015). *SOCPROG: Programming for analysing social structures*, version  
31 2.6.

32  
33

1 **Supplementary Material**

2

3 Supplementary Material 1. Plots of number of minutes a male was seen versus the number  
4 of days he was sighted.

5

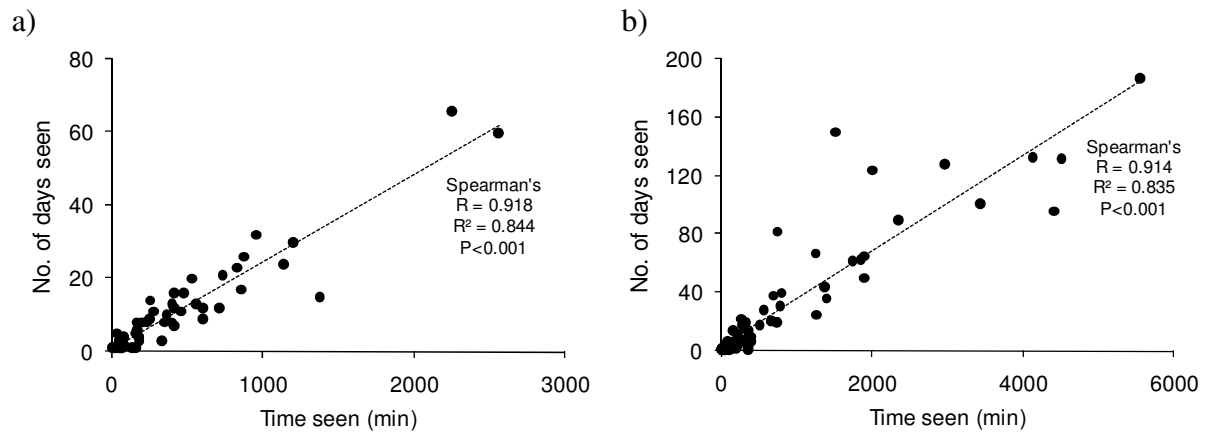

6

7 Supplementary Material 1, Figure 1. The number of days a male was sighted and the  
8 number of minutes he was totally sighted, in a) female presence (N=56) and b) female  
9 absence (N=91). The values are strongly correlated in both cases.

10

11

12

1 Supplementary Material 2. Cumulative number of males identified.

2

3 Based on sightings in which all adult males were aged and identified, there were a total of  
4 96 identified elephants. While it is natural for new elephants to arrive in the area due to  
5 dispersal, the cumulative number of identified adult males did not increase drastically  
6 during the last two years of the study period (Figure 1).

7

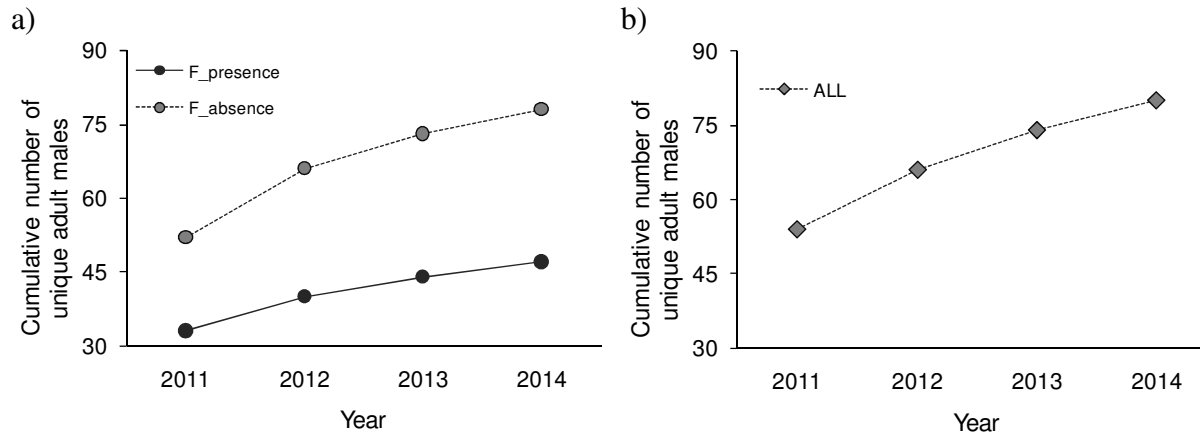

8

9 Supplementary material 2, Figure 1. Cumulative numbers of identified adult males sighted  
10 across years and (plotted separately based on female presence or absence (a), and also  
11 totally (b)) that were sighted during 2011-2014. During the last year of sampling, we sighted  
12 only 3 new males in female presence (6.5% of the 47 adults sighted from 2011-2014) and 5  
13 new males in female absence (6.4% of the 78 adults sighted in female absence during this  
14 period).

15

16

17

18



1 Supplementary Material 3. ANCOVA results with actual proportion values and Spearman's  
2 rank-order correlations between male age and proportion of time spent in groups of different  
3 types.

4

5 Supplementary material 3, Table 1. ANCOVA on proportion of time a male spent in  
6 different group types with group type (all-male groups and mixed-sex groups) as a  
7 categorical factor and male age as the covariate. Group type, but not age, had a significant  
8 effect. Significant results are marked in bold.

9

|             | <i>SS</i>    | <i>Degree of freedom</i> | <i>MS</i>    | <i>F</i>      | <i>P</i>         |
|-------------|--------------|--------------------------|--------------|---------------|------------------|
| Age (years) | 0.015        | 1                        | 0.015        | 0.474         | 0.493            |
| Group type  | <b>1.292</b> | <b>1</b>                 | <b>1.292</b> | <b>39.699</b> | <b>&lt;0.001</b> |
| Error       | 2.701        | 83                       | 0.032        | -             | -                |

10

11

12 A Spearman's rank-order correlation was carried out between individual male ages and the  
13 proportions of time spent by those males in all-male groups. A similar correlation was also  
14 carried out between age and the proportion of time spent in mixed-sex groups and the  
15 proportion of time spent solitarily. We used those males who were seen on five different  
16 days or more during the study period ( $N=43$  for all three correlations) for these correlations.

17

18 We compared the proportion of time spent by a male in all-male groups with other adults  
19 ( $AM>1$ ) with his age and we found that there was no significant correlation (Spearman's  
20 rank-order correlation,  $R=-0.117$ ,  $R^2=0.014$ ,  $P>0.05$ ). Similarly, we also found that the age  
21 of the male did not affect the proportion of time he spent in mixed-sex groups (Spearman's  
22 rank-order correlation,  $R=-0.180$ ,  $R^2=0.032$ ,  $P>0.05$ ) or the proportion of time he spent  
23 solitarily (Spearman's rank-order correlation,  $R=0.189$ ,  $R^2=0.036$ ,  $P>0.05$ ) These values are  
24 plotted, along with the correlation results, in Figures 1 a,b and c.

25

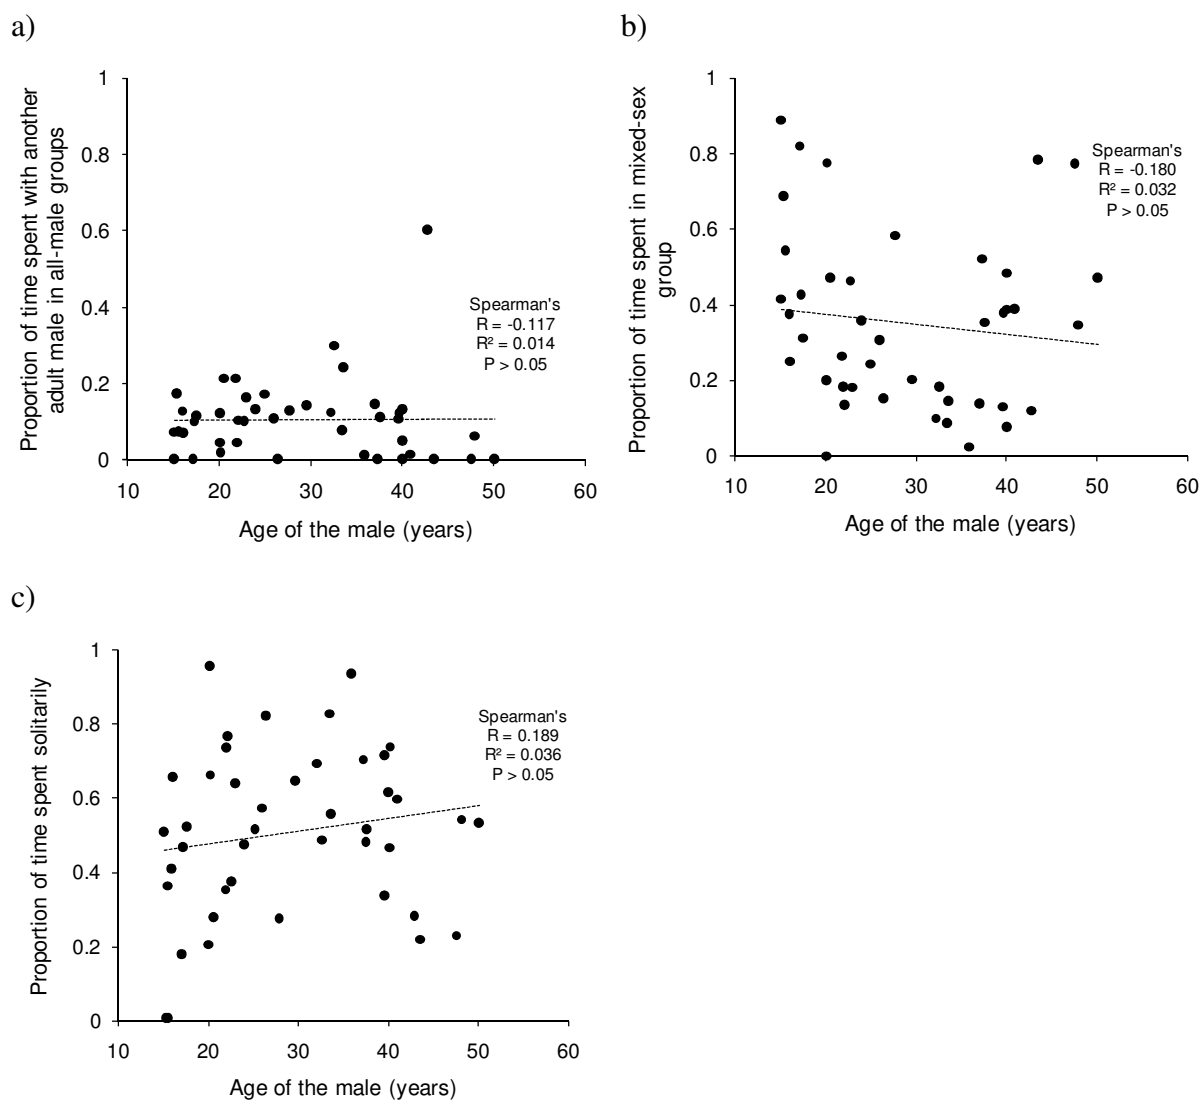

1  
2 Supplementary material 3, Figure 1. Proportion of total time spent in a) all-male groups with  
3 multiple adult males, b) mixed-sex groups, plotted against male age and c) solitarily.

4  
5  
6 We calculated the interquartile range (the difference between the upper (75%) quartile value  
7 and the lower (25%) quartile value) for each set of proportion values and assigned those  
8 values which lay outside the inner fences of the dataset (calculated as  $1.5 \times \text{interquartile}$   
9  $\text{range} + \text{upper quartile}$  to  $1.5 \times \text{interquartile range} - \text{lower quartile}$ ) as outliers. By this  
10 definition, we detected only one outlier in the proportion of time spent in all-male groups  
11 with other adult males and after removing it, the result of the correlation between age and  
12 the proportion remained the same (Spearman's rank-order correlation,  $N=42$ ,  $R=-0.176$ ,  
13  $R^2=0.031$ ,  $P>0.05$ ).

14

1 Supplementary material 4. Time spent together by the commonly seen adult males of the  
2 same and different age-classes.

3

4 As mentioned in the Methods and in the main Results, we compared the observed male  
5 associations in female presence and absence with those obtained by randomly permuting  
6 either males alone within the female presence or female absence datasets, or by permuting  
7 both males and female presence/absence status for the sighting across the entire dataset.  
8 While results based on sightings of all males are shown in the Results, we also carried out  
9 this analysis on the dataset of only the 33 common males that were sighted for 5 days or  
10 more, both in female presence and in female absence. When we randomised these sightings  
11 by switching males between sightings in female presence, we found that old males spent  
12 less time with each other than expected by chance (Observed: 170 minutes; Randomised:  
13 average  $\pm$  SD:  $317.7 \pm 15.09$ ,  $P < 0.001$ ), the time that old and young males spent with each  
14 other (891 minutes) was not different from what was expected by chance (average  $\pm$  SD:  
15  $878.9 \pm 19.51$ ,  $P = 0.130$ ), and the time that young males spent with each other (750 minutes)  
16 was greater than expected by chance (average  $\pm$  SD:  $563.8 \pm 17.76$ ,  $P < 0.001$ ; Figure 1). In  
17 female absence, the time that old males spent together (1201 minutes) was not different  
18 from what was expected by chance (average  $\pm$  SD:  $1218.1 \pm 26.44$ ,  $P = 0.365$ ), the time that  
19 old and young males spent together (1822 minutes) was less than expected (average  $\pm$  SD:  
20  $2120.1 \pm 30.51$ ,  $P < 0.001$ ), and the time that young males spent together (1243 minutes) was  
21 greater than expected by chance (average  $\pm$  SD:  $880.4 \pm 23.72$ ,  $P < 0.001$ ; Figure 1). Thus,  
22 the only difference between the results obtained based on only the common males as  
23 opposed to all 96 identified adult males was that, in female absence, the commonly seen old  
24 males spent time with each other as expected by chance, whereas old males in general  
25 (when all 96 were included) spent more time with each other than expected by chance. If  
26 male associations were primarily a means for testing strengths, such a pattern is expected as  
27 males that are common in an area may be familiar with one another's strengths, not  
28 necessitating extended associations.

29

30

31

a) Female presence

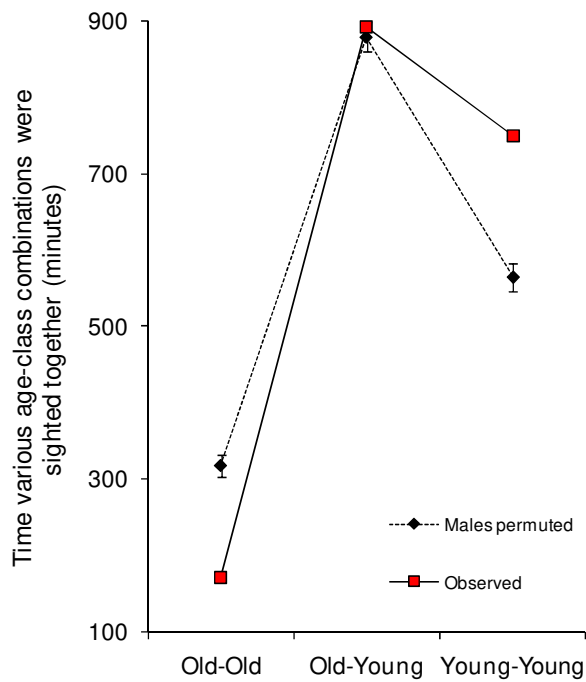

b) Female absence

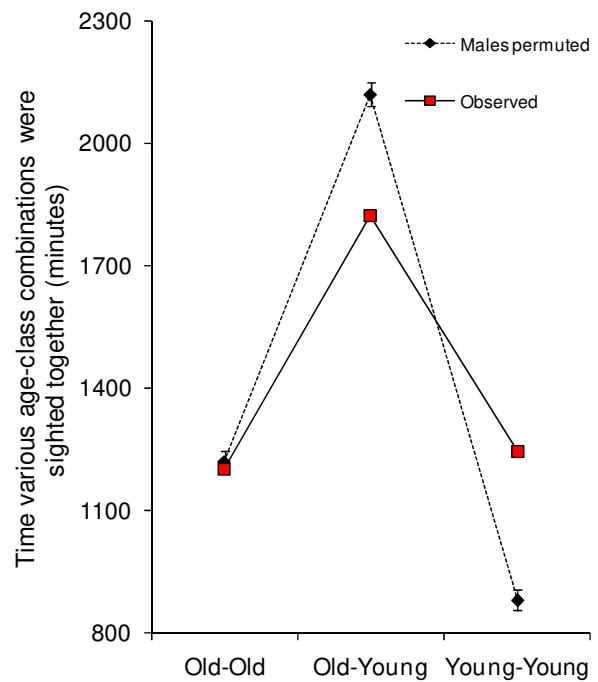

1

2 Supplementary material 4, Figure 1. Permuted and observed values of time spent together  
3 by adult males of the same and different age-classes in a) female presence and b) female  
4 absence. Please note that the Y axis scales differ across the two panels.

5

6

7

8

1 Supplementary Material 5. ANCOVA results on proportion of time a male spent with other  
2 males, in female presence and absence, using the actual proportion values.

3

4 Supplementary material 5, Table 1. ANCOVA on the proportion of time a male spent with  
5 other males in female presence and absence, with female presence as a categorical factor  
6 and male age as the covariate. Neither female presence nor age had a significant effect.

7 Significant results are marked in bold.

8

|                 | <i>SS</i> | <i>Degree of freedom</i> | <i>MS</i> | <i>F</i> | <i>P</i> |
|-----------------|-----------|--------------------------|-----------|----------|----------|
| Age (years)     | <0.001    | 1                        | <0.001    | 0.007    | 0.933    |
| Female presence | 0.117     | 1                        | 0.117     | 2.901    | 0.092    |
| Error           | 3.260     | 81                       | 0.040     | -        | -        |

9

10

11

12

1 Supplementary material 6. Group size distributions of multi-male groups and experienced  
 2 group sizes of males in female presence and absence.

3  
 4 As mentioned in the main text, the group size distributions of multi-male groups that we  
 5 observed in female presence and absence were small, with a mode of 2 (Figure 1 below).  
 6 The group sizes (counted as the number of adult males) experienced by adult males were  
 7 small, with a mode of 1 (Figure 2 below), in female presence and in female absence.

8  
 9

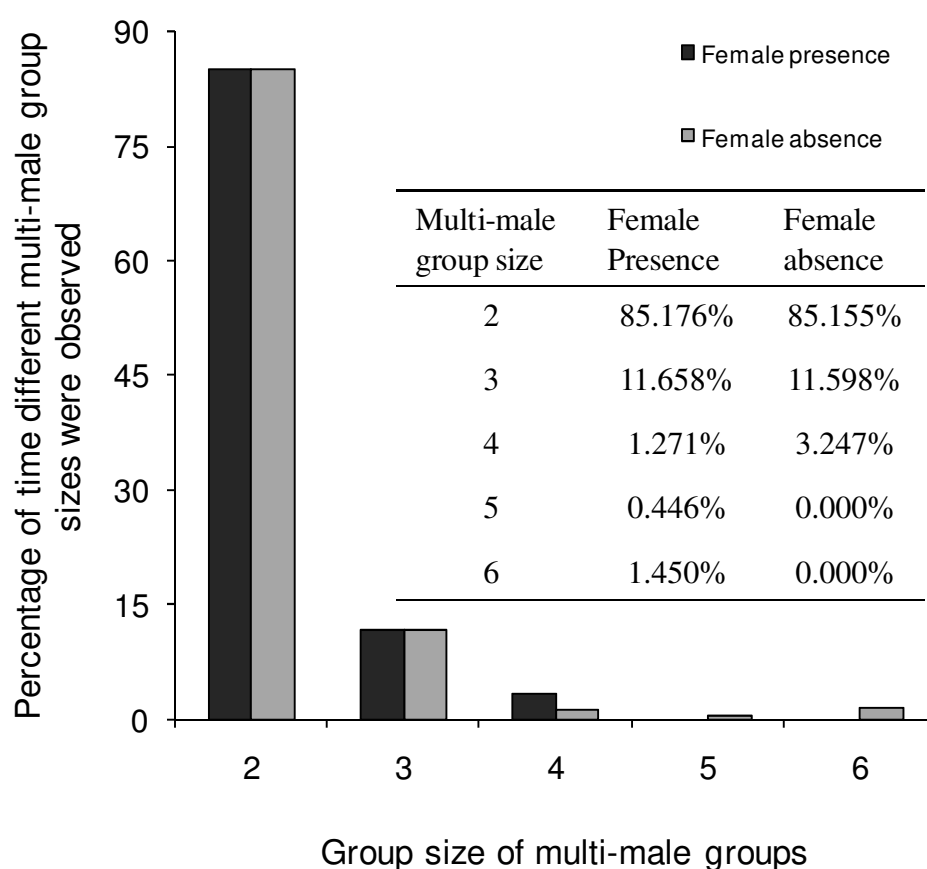

10  
 11 Supplementary material 6, Figure 1. Percentage of observation time of multi-male groups of  
 12 different sizes (number of adult males) in female presence and absence.

13  
 14

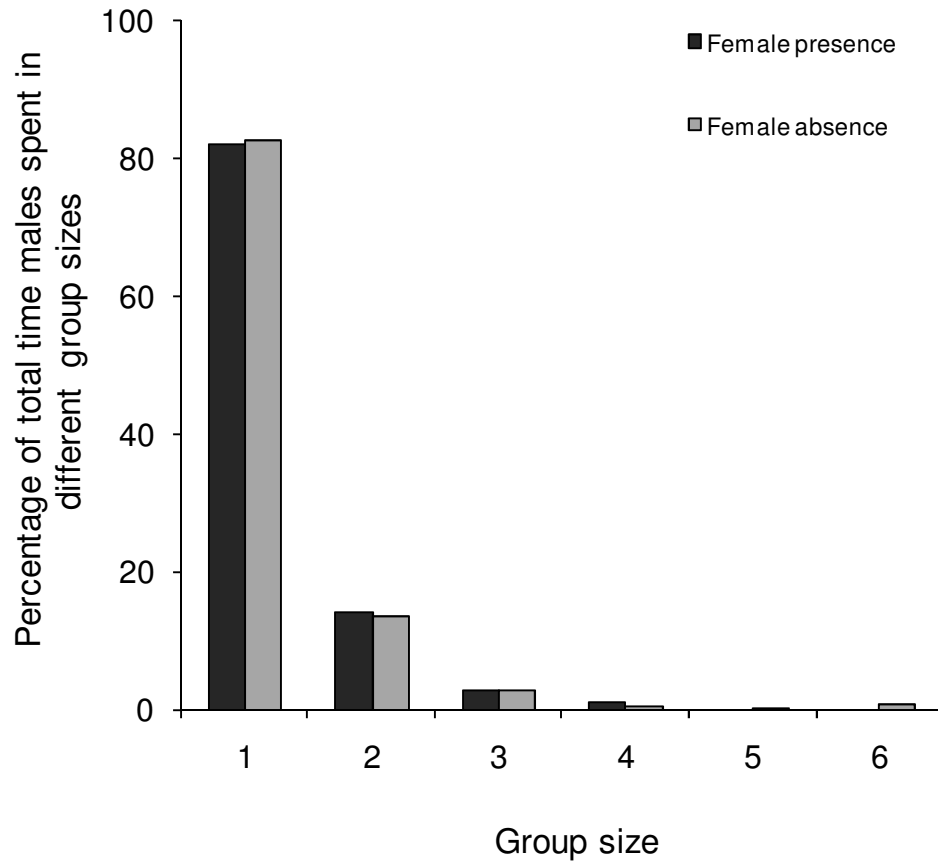

1

2 Supplementary material 6, Figure 2. Percentage of the male's total time spent in groups of  
3 different sizes (different numbers of adult males) in female presence and absence. Groups in  
4 female absence include solitary males and all-male groups, while groups in female presence  
5 include mixed-sex groups.

6

7

8

1 Supplementary Material 7. Degree distributions of association networks in female presence  
2 and female absence.

3  
4 We compared the degree distribution of our observed networks to Poisson distributions  
5 (expected for a Erdős-Rényi random network; Erdős and Rényi 1960). We found that the  
6 observed distribution in female presence was not significantly different from Poisson  
7 ( $\chi^2=0.965$ ,  $P=0.326$ ) while the one in female absence was significantly different ( $\chi^2=26.552$ ,  
8  $P<0.001$ ). The distributions are plotted below.

9

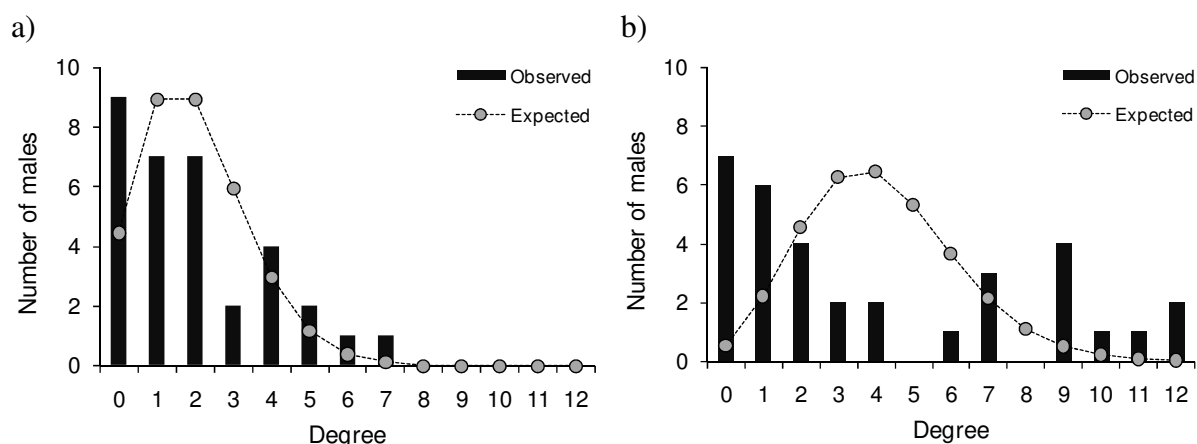

10

11 Supplementary Material 7, Figure 1. Observed (bars) and expected (lines) degree  
12 distributions of male association networks in a) female presence and b) female absence.

13

14

## 15 References

16

17 Erdős P and Rényi A (1960). On the evolution of random graphs. *Publications of the*  
18 *Mathematical Institute of the Hungarian Academy of Sciences* 5: 17–61.

19

20

21



1 Supplementary Material 8. Results of the sampled randomisation test based on AI between  
2 males in female presence and female absence and AI distributions.

3

4 Based on the sampled randomisation test, the non-zero AIs between old males were  
5 significantly higher in female absence than in female presence (Table 1 below). As  
6 mentioned in the main text, the time spent by old males together had also been higher in  
7 female absence than in female presence (Figure 1 a,b in the main text). However, while the  
8 absolute amounts of time young males were seen together had been higher in female  
9 absence than in female presence (Figure 1 a,b in the main text), the non-zero AIs between  
10 young males were significantly higher in female presence than in female absence (Table 1  
11 below), indicating a higher strength of associations in female presence despite the smaller  
12 time spent. Similarly, while the absolute amounts of time young and old males were seen  
13 together had been higher in female absence than in female presence (Figure 1 a,b in the  
14 main text), the non-zero AIs between young and old males were also significantly higher in  
15 female presence than in female absence (Table 1 below). However, the magnitude of  
16 differences in AI values are too small to make far-reaching inferences.

17

18 When we included the zero AI values and calculated an average AI for the same set of  
19 males, the average AI values for all three age classes of males were higher in female  
20 absence than in female presence (Table 2 below) because the degrees for all combinations  
21 of age-classes were higher in female absence (see main text). The AI distributions are  
22 shown in Figures 1-3 below.

23

24

25 Supplementary material 8, Table 1. AI between associates, within and between age-classes,  
26 in observed and permuted female presence and female absence datasets.  $P=(\text{number of}$   
27  $\text{times difference}_{\text{random}} \geq \text{difference}_{\text{observed}}) / \text{number of randomisations (10,000)}$ . Significant  $P$   
28 values are marked in bold.

29

---

| Category                    | Ave. non-zero AI<br>between two 30+ | Ave. non-zero AI<br>between 30+ and 15-30 | Ave. non-zero AI<br>between two 15-30 |
|-----------------------------|-------------------------------------|-------------------------------------------|---------------------------------------|
| Female presence<br>observed | 0.0096                              | 0.0140                                    | 0.0152                                |

---

|                                       |                 |                   |                   |
|---------------------------------------|-----------------|-------------------|-------------------|
| Female absence<br>observed            | 0.0112          | 0.0107            | 0.0117            |
| Female presence<br>permuted ave. (SD) | 0.0089 (0.0007) | 0.0087 (0.0005)   | 0.0073 (0.0002)   |
| Female absence<br>permuted ave. (SD)  | 0.0084 (0.0004) | 0.0085 (0.0002)   | 0.0077 (0.0005)   |
| <i>P</i> value                        | <b>0.0197</b>   | <b>&lt;0.0001</b> | <b>&lt;0.0001</b> |

1  
2  
3  
4  
5  
6  
7

Supplementary material 8, Table 2. Average AI (including zero values) between males, within and between age-classes, in observed and permuted female presence and female absence datasets.  $P = (\text{number of times difference}_{\text{random}} \geq \text{difference}_{\text{observed}}) / \text{number of randomisations (10,000)}$ . Significant *P* values are marked in bold.

| Category                              | Ave. AI<br>between two 30+ | Ave. AI<br>between 30+ and 15-30 | Ave. AI<br>between two 15-30 |
|---------------------------------------|----------------------------|----------------------------------|------------------------------|
| Female presence<br>observed           | 0.0004                     | 0.0009                           | 0.0009                       |
| Female absence<br>observed            | 0.0014                     | 0.0013                           | 0.0014                       |
| Female presence<br>permuted ave. (SD) | 0.0012 (0.0001)            | 0.0013 (0.0001)                  | 0.0012 (0.0001)              |
| Female absence<br>permuted ave. (SD)  | 0.0012 (<0.0001)           | 0.0013 (<0.0001)                 | 0.0012 (<0.0001)             |
| <i>P</i> value                        | <b>&lt;0.0001</b>          | <b>&lt;0.0001</b>                | <b>&lt;0.0001</b>            |

8  
9  
10

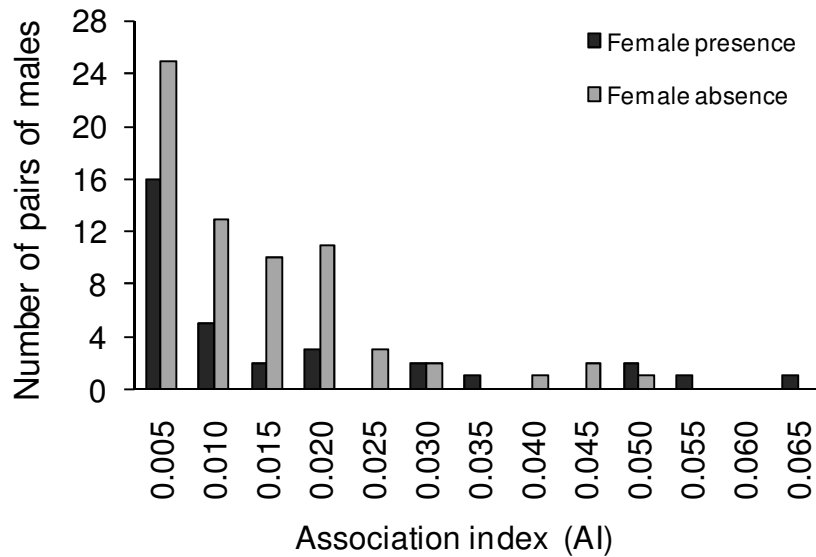

1  
2  
3  
4  
5  
6

Supplementary material 8, Figure 1. Distribution of non-zero AI values between males (seen on  $\geq 5$  days each in female presence and absence,  $N=33$ ) in female presence and absence.

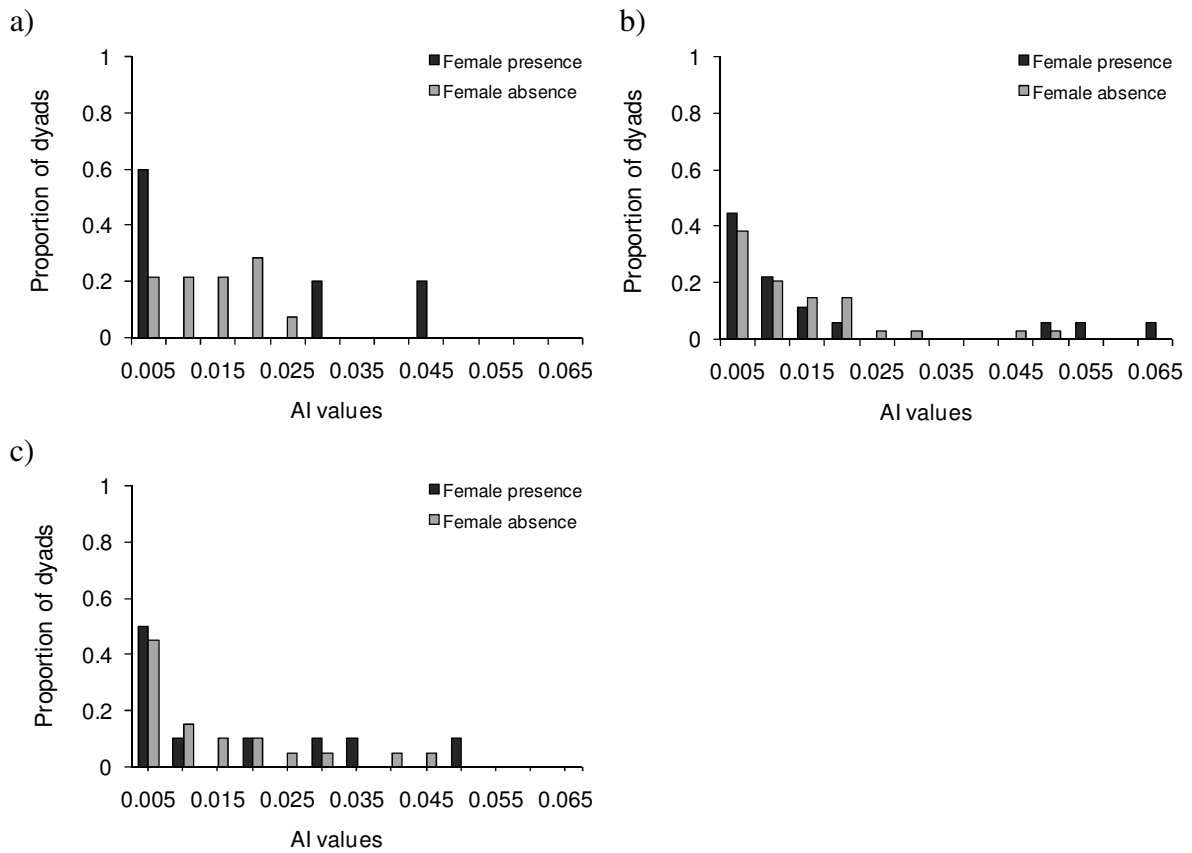

7  
8  
9

Supplementary material 8, Figure 2. Frequency distributions of non-zero AI values between a) pairs of 30+ year old males, b) 30+ year old males and 15-30 year old males, c) pairs of

1 15-30 year old males, in female presence and absence.

2

3

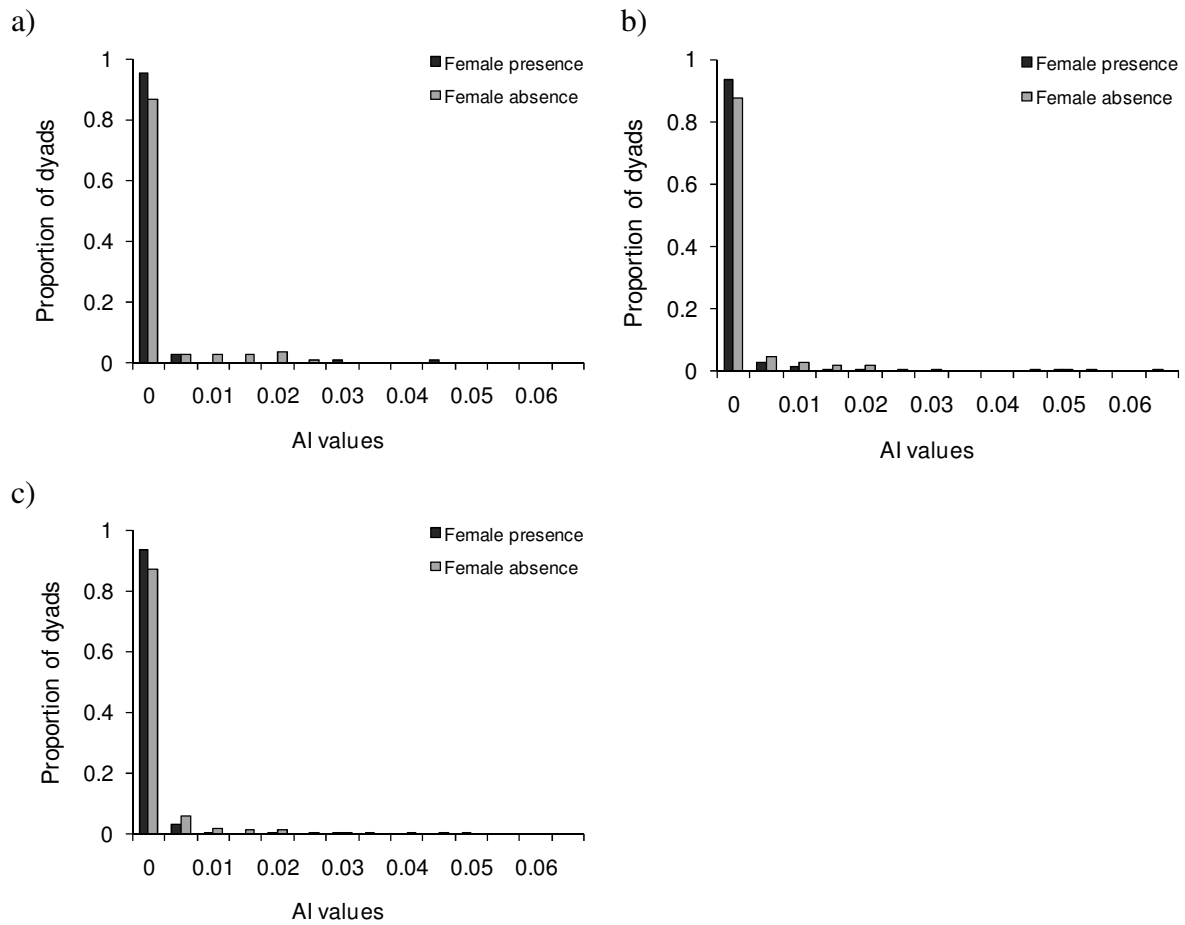

4

5 Supplementary material 8, Figure 3. Frequency distributions of average AI values of a) pairs

6 of 30+ year old males, b) 30+ year old males with 15-30 year old males, and c) pairs of 15-

7 30 year old males, in female presence and absence.

8

9

10

1 Supplementary material 9. Correlations between different centrality measures

2

3 We found that all the three centrality measures we had measured in the male association  
4 networks were strongly correlated with each other. Therefore, we chose only one of them  
5 (closeness centrality) to correlate with male age. Results of the correlations are provided in  
6 the table below.

7

8

9 Supplementary material 9, Table 1. Correlation test results between different centrality  
10 measures. All comparisons were significant and are, hence, marked in bold.

11

---

| Network statistics                                      | Female presence<br>(N=33)                                                                   | Female absence<br>(N=33)                                                                    |
|---------------------------------------------------------|---------------------------------------------------------------------------------------------|---------------------------------------------------------------------------------------------|
| Closeness centrality<br>and<br>Betweenness centrality   | <b>Spearman's<br/><math>R=0.896</math>, <math>R^2=0.803</math>, <math>P&lt;0.001</math></b> | <b>Spearman's<br/><math>R=0.704</math>, <math>R^2=0.496</math>, <math>P&lt;0.001</math></b> |
| Closeness centrality<br>and<br>Eigenvector centrality   | <b>Spearman's<br/><math>R=0.963</math>, <math>R^2=0.927</math>, <math>P&lt;0.001</math></b> | <b>Spearman's<br/><math>R=0.782</math>, <math>R^2=0.611</math>, <math>P&lt;0.001</math></b> |
| Betweenness centrality<br>and<br>Eigenvector centrality | <b>Spearman's<br/><math>R=0.798</math>, <math>R^2=0.637</math>, <math>P&lt;0.001</math></b> | <b>Spearman's<br/><math>R=0.859</math>, <math>R^2=0.738</math>, <math>P&lt;0.001</math></b> |

---

12

13

14

1 Supplementary Material 10. Permutation tests to test for preferential associations

2

3 We used SOCPROG 2.6 to perform permutations tests to check for preferred associations  
 4 across 14-day sampling intervals (*permute associations within samples*). This method  
 5 accounts for differences in gregariousness. We used 10,000 permutations with 10,000 flips  
 6 per permutation for this test. The results of the permutation tests are tabulated below (Table  
 7 1).

8

9

10 Supplementary Material 10, Table 1. Observed and random values of statistics and *P* values  
 11 from the permutation test for preferred associations in female presence and in female  
 12 absence, using 10,000 permutations and 10,000 flips per permutation. The number of  
 13 identified males in each category are shown. Statistically significant values ( $P < 0.05$ ) are  
 14 marked in bold. The significance of mean AI is not meaningful in this test.

15

| Category                                     | Statistic         | Observed value | Ave. random value using 10000 flips | <i>P</i> (1-sided) (10000 flips) |
|----------------------------------------------|-------------------|----------------|-------------------------------------|----------------------------------|
| Adult males in female presence; <i>N</i> =56 | Mean AI           | 0.0021         | 0.0021                              | -                                |
|                                              | SD of AI          | 0.0106         | 0.0106                              | 0.5765                           |
|                                              | CV of AI          | 5.1244         | 5.0830                              | 0.2109                           |
|                                              | Mean non-zero AI  | 0.0385         | 0.0387                              | 0.5709                           |
|                                              | SD of non-zero AI | 0.0265         | 0.0259                              | 0.3857                           |
|                                              | CV of non-zero AI | 0.6867         | 0.6683                              | 0.2750                           |
| Adult males in female absence; <i>N</i> =91  | Mean AI           | 0.0005         | 0.0005                              | -                                |
|                                              | SD of AI          | 0.0043         | 0.0042                              | 0.0962                           |
|                                              | CV of AI          | <b>8.4534</b>  | <b>8.3012</b>                       | <b>0.0097</b>                    |
|                                              | Mean non-zero AI  | 0.0176         | 0.0172                              | 0.0958                           |
|                                              | SD of non-zero AI | <b>0.0183</b>  | <b>0.0177</b>                       | <b>0.0189</b>                    |
|                                              | CV of non-zero AI | 1.0366         | 1.0343                              | 0.4431                           |

16

17

18 **References**

19

- 1 1. Whitehead H (2015). SOCPROG: Programming for analysing social structures, version
- 2 2.6.
- 3
- 4
- 5

1 Supplementary material 11. Mantel test results of correlations between association index  
2 matrices of consecutive years in female presence and absence.

3  
4 Results of Mantel tests of matrix correlations between AI matrices of consecutive years,  
5 using common males (males seen for 30 minutes or more in the years being compared).  
6 None of the comparisons, except for one in female absence, yielded a significant correlation  
7 (Table 1 below).

8  
9  
10 Supplementary material 11, Table 1. Mantel test results with 5000 permutations for  
11 comparisons between AI matrices of common males in consecutive years in female  
12 presence and female absence.

13

|           | Female presence |          |          | Female absence |              |              |
|-----------|-----------------|----------|----------|----------------|--------------|--------------|
|           | <i>N</i>        | <i>R</i> | <i>P</i> | <i>N</i>       | <i>R</i>     | <i>P</i>     |
| 2011-2012 | 17              | -0.062   | 1.000    | 28             | -0.012       | 0.429        |
| 2012-2013 | 15              | -0.037   | 0.463    | 24             | 0.005        | 0.328        |
| 2013-2014 | 9               | -0.061   | 1.000    | <b>21</b>      | <b>0.238</b> | <b>0.008</b> |

14

15

16

17



1 Supplementary Material 12. Adult male group sizes in all-male groups in Kabini and  
2 Amboseli.

3

4 We examined the adult male group sizes in all-male groups in Kabini and Amboseli. The  
5 average group size of groups of adult males in all-male groups in the Amboseli population  
6 was (average  $\pm$  SD)  $3.325 \pm 1.995$  ( $N=939$  groups; Chiyo *et al.* 2011). As groups were  
7 sampled once a day in Chiyo *et al.*'s (2011) study (while we had looked at changes in group  
8 composition minute by minute), we also sampled from our data similarly to compare the  
9 group sizes. Thus, an all-male group would only sampled if at least one of the adult males in  
10 it was being sighted for the first time that day in female absence. After sampling in this  
11 manner, we obtained 120 sightings of all-male groups. We compared the average all-male  
12 group sizes in Kabini (average  $\pm$  SD:  $2.100 \pm 0.328$ ,  $N=120$ ) to the all-male group sizes in  
13 Amboseli using Welch's two sample test (Welch 1937, see Fagerland and Sandvik 2009).  
14 We found that the group sizes were significantly different, with the adult male groups in  
15 Amboseli being larger than those in Kabini (Welch's two sample test:  $U=17.095$ ,  
16  $fu=1017.865$ ,  $P<0.001$ ; Figure 1, Table 1).

17

18 Thus, males in the Kabini population not only spent much less time in all-male groups than  
19 in the Amboseli African savannah elephant population, but, when they formed all-male  
20 groups, their group sizes were also smaller than in Amboseli.

21

22

23 Supplementary material 12, Table 1. The average, standard deviation, mode, median,  
24 maximum and minimum of group sizes of all-male groups in Kabini and Amboseli.

25

| Group sizes in all-male groups | Amboseli          | Kabini            |
|--------------------------------|-------------------|-------------------|
| Average $\pm$ SD               | $3.325 \pm 1.995$ | $2.100 \pm 0.328$ |
| Median                         | 2                 | 2                 |
| Mode                           | 2                 | 2                 |

|         |    |   |
|---------|----|---|
| Minimum | 2  | 2 |
| Maximum | 18 | 4 |

---

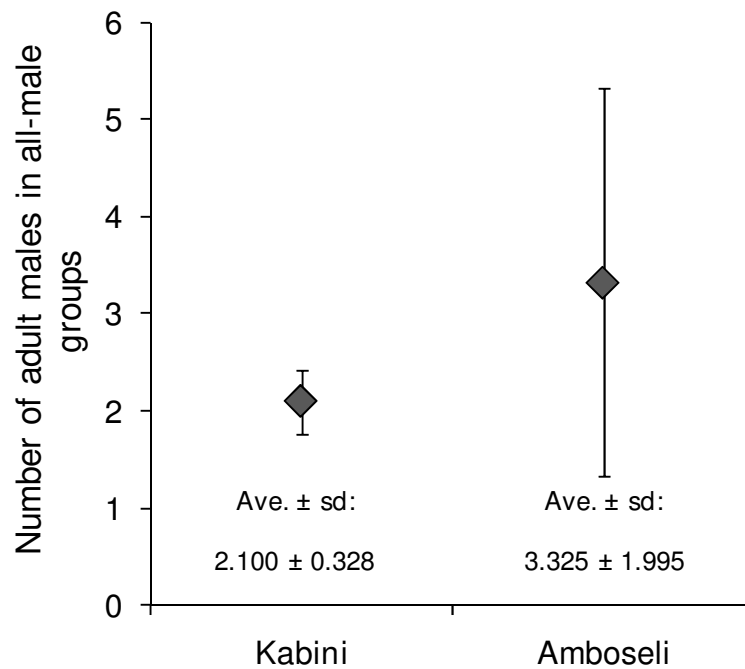

Supplementary material 12, Figure 1. Group sizes of adult males in all-male groups in Amboseli and Kabini, when each male was sampled once a day.

## References

1. Chiyo PI, Archie EA, Hollister-Smith JA, Lee PC, Poole JH, Moss CJ and Alberts SC (2011). Association patterns of African elephants in all-male groups: the role of age and genetic relatedness. *Animal Behaviour* 81: 1093-1099.
2. Fagerland MW and Sandvik L (2009). Performance of five two-sample location tests for skewed distributions with unequal variances. *Contemporary Clinical Trials* 30: 490-496.
3. Welch BL (1937). On the z-test in randomized blocks and Latin squares. *Biometrika* 29: 21-52.
